# Supplementary material
Source: MDPI journal article supplement (https://www.mdpi.com/2227-7080/11/4/86)
Supplement: s1 [file s1]

## Supplementary Information

Enhancement of handshake attraction through tactile, visual, and auditory multimodal stimulation

Taishu Kumagai & Yoshimune Nonomura\*

Department of Applied Chemistry, Chemical Engineering, and Biochemical Engineering,  
Graduate School of Science and Engineering, Yamagata University, Yonezawa, Japan

**Table S1** Score of sensory evaluation.**(a) Attraction**

| ID      | gender | S <sup>T</sup> | F <sup>T</sup> | A <sup>T</sup> | S <sup>TV</sup> | F <sup>TV</sup> | A <sup>TV</sup> | S <sup>TA</sup> | F <sup>TA</sup> | A <sup>TA</sup> | S <sup>TVA</sup> | F <sup>TVA</sup> | A <sup>TVA</sup> |
|---------|--------|----------------|----------------|----------------|-----------------|-----------------|-----------------|-----------------|-----------------|-----------------|------------------|------------------|------------------|
| 1       | woman  | 0.1            | 4.7            | 0.1            | 3.1             | 9               | 0               | 0.2             | 8.8             | 0.1             | 5.7              | 8                | 0.3              |
| 2       | man    | 5.9            | 7.1            | 0              | 10              | 10              | 0               | 9.2             | 6.5             | 0               | 10               | 8.9              | 0                |
| 3       | man    | 5.4            | 1.3            | 1.5            | 3.5             | 10              | 0               | 5.7             | 8               | 0.5             | 8                | 10               | 2.3              |
| 4       | man    | 2.6            | 4.5            | 0              | 8.9             | 6.2             | 1.9             | 2.6             | 1               | 0               | 10               | 8                | 2.4              |
| 5       | man    | 5.1            | 0              | 0              | 8.8             | 6.7             | 1.1             | 4.5             | 2.7             | 0               | 6.8              | 5.3              | 3.1              |
| 6       | woman  | 8.4            | 7.6            | 2              | 9               | 6.8             | 1               | 8               | 7.5             | 0.6             | 9                | 6.5              | 2                |
| 7       | man    | 4.7            | 5.7            | 0              | 7.3             | 6               | 0               | 6               | 6               | 0               | 6.2              | 6.2              | 0                |
| 8       | man    | 6.2            | 3              | 0              | 5.9             | 7.3             | 2.9             | 4.8             | 4.8             | 3               | 9.2              | 6.8              | 3.7              |
| 9       | woman  | 0              | 5.5            | 0              | 7.2             | 6.6             | 0               | 5.2             | 6.5             | 0.7             | 6.6              | 7.6              | 0                |
| 10      | man    | 0.6            | 0.6            | 0              | 1.1             | 0.4             | 0               | 0.3             | 0.3             | 0               | 5                | 0.8              | 0                |
| 11      | man    | 0              | 0              | 0              | 0               | 2.6             | 0               | 0               | 0               | 0               | 7.5              | 6.2              | 0                |
| 12      | woman  | 4.8            | 6.3            | 0.9            | 6.4             | 3.7             | 1.8             | 6.4             | 6.4             | 1.8             | 7.1              | 3.7              | 2.2              |
| 13      | woman  | 1.3            | 0              | 0              | 3.8             | 5.1             | 0               | 2.5             | 3.3             | 0.9             | 8                | 6                | 0                |
| 14      | man    | 0              | 0.4            | 0              | 3.2             | 3.4             | 1.5             | 2               | 1.8             | 2.3             | 4.5              | 3.9              | 2.5              |
| 15      | man    | 0.5            | 5.4            | 0.3            | 3.8             | 4.7             | 1.7             | 6               | 4.5             | 2.8             | 7.5              | 8.3              | 5.1              |
| 16      | woman  | 5.6            | 7.5            | 0              | 4.2             | 3.1             | 1.3             | 6.7             | 6.6             | 0               | 7.4              | 4.3              | 2                |
| 17      | man    | 1.5            | 1.5            | 1.7            | 7               | 6.7             | 7               | 5               | 6.2             | 5.5             | 7.7              | 8.4              | 7.6              |
| 18      | man    | 5.3            | 6.7            | 0.6            | 9.5             | 4               | 1.7             | 7.9             | 6.6             | 1.2             | 6.2              | 5.5              | 1                |
| 19      | woman  | 0.1            | 0              | 0              | 3.5             | 7               | 0.7             | 2.9             | 2.7             | 1.5             | 8.1              | 6.1              | 0.8              |
| 20      | woman  | 3              | 7.8            | 0              | 7.2             | 8.4             | 2.6             | 7.9             | 5.4             | 0.6             | 8.6              | 6.6              | 1.1              |
| 21      | woman  | 6.2            | 5.6            | 1.1            | 7.7             | 7.7             | 0.1             | 8.6             | 6.7             | 0.9             | 7.2              | 8                | 1.5              |
| 22      | woman  | 7              | 8.2            | 1.6            | 6.9             | 7.6             | 2.3             | 6.4             | 7.5             | 3               | 7.1              | 7                | 1.8              |
| 23      | woman  | 9.5            | 7.2            | 0              | 7.3             | 9               | 0.9             | 9               | 7.2             | 0.7             | 9.5              | 9                | 1.9              |
| 24      | man    | 2.3            | 3.1            | 0              | 8.6             | 6.6             | 0.6             | 5.9             | 8.7             | 1.2             | 10               | 9.1              | 1.6              |
| 25      | woman  | 1.5            | 1.7            | 0              | 2.8             | 0               | 0               | 1.9             | 0               | 0               | 5                | 0                | 0                |
| 26      | woman  | 4.7            | 4.9            | 0              | 9.1             | 7.8             | 0               | 8               | 5.2             | 0               | 8.2              | 8.5              | 0                |
| 27      | man    | 6.8            | 6.5            | 0              | 3.2             | 5.4             | 1.4             | 4.3             | 3.3             | 1.1             | 8.5              | 7.4              | 0.7              |
| 28      | woman  | 9              | 7.1            | 0              | 5.4             | 3.1             | 0               | 9.2             | 4.8             | 1               | 9.4              | 6.1              | 0.5              |
| 29      | woman  | 6              | 5.5            | 2.1            | 7.2             | 3.7             | 1               | 7.4             | 7.4             | 5.6             | 8.5              | 6.9              | 4.7              |
| 30      | man    | 7.4            | 5.1            | 1.9            | 6.5             | 3.8             | 1.9             | 7.2             | 6               | 2.3             | 8.1              | 6.2              | 1.8              |
| Average |        | 4.1            | 4.4            | 0.5            | 5.9             | 5.7             | 1.1             | 5.4             | 5.1             | 1.2             | 7.7              | 6.5              | 1.7              |
| SD      |        | 3.0            | 2.8            | 0.7            | 2.6             | 2.6             | 1.4             | 2.8             | 2.6             | 1.5             | 1.5              | 2.3              | 1.8              |

**(b) Humanity**

| ID      | gender | S <sup>T</sup> | F <sup>T</sup> | A <sup>T</sup> | S <sup>TV</sup> | F <sup>TV</sup> | A <sup>TV</sup> | S <sup>TA</sup> | F <sup>TA</sup> | A <sup>TA</sup> | S <sup>TVA</sup> | F <sup>TVA</sup> | A <sup>TVA</sup> |
|---------|--------|----------------|----------------|----------------|-----------------|-----------------|-----------------|-----------------|-----------------|-----------------|------------------|------------------|------------------|
| 1       | woman  | 0.1            | 0              | 0              | 0.2             | 0.1             | 0.1             | 7.8             | 0.2             | 0.1             | 6.1              | 1.6              | 0.4              |
| 2       | man    | 6.4            | 0              | 0              | 8.9             | 0.9             | 0               | 6.8             | 0               | 0               | 8                | 1.5              | 0                |
| 3       | man    | 9.3            | 1.5            | 0              | 6.4             | 10              | 0               | 7.9             | 0               | 0               | 7.8              | 9.5              | 0                |
| 4       | man    | 1.7            | 0              | 0              | 9.1             | 5               | 0.9             | 3.6             | 0               | 0               | 10               | 8.4              | 2.1              |
| 5       | man    | 7.5            | 0              | 0              | 8.7             | 1.7             | 0               | 7.6             | 0               | 0               | 7                | 0                | 1.9              |
| 6       | woman  | 8.1            | 0              | 0.9            | 8.8             | 5.9             | 0.2             | 7.5             | 5.3             | 0.4             | 9.1              | 6.9              | 0.8              |
| 7       | man    | 3.7            | 3.6            | 0              | 7.7             | 2.7             | 0               | 4.8             | 2.9             | 0               | 5                | 6.3              | 0                |
| 8       | man    | 6.8            | 0              | 0              | 7.6             | 2.6             | 0               | 0.1             | 0               | 0               | 8.5              | 6                | 1.4              |
| 9       | woman  | 0              | 0              | 0              | 8.5             | 0               | 0               | 5               | 6.9             | 1               | 6                | 4                | 0                |
| 10      | man    | 0.1            | 0              | 0              | 1.7             | 0.2             | 0               | 0.5             | 0               | 0               | 4.9              | 0.9              | 0                |
| 11      | man    | 0              | 0              | 0              | 0.8             | 1.3             | 1.2             | 0               | 0               | 0               | 1.8              | 0.7              | 0                |
| 12      | woman  | 3.7            | 6.5            | 0.9            | 6.1             | 3.4             | 0.5             | 6.6             | 6.9             | 2.1             | 4.5              | 2.2              | 0.7              |
| 13      | woman  | 1.7            | 0              | 0              | 2.7             | 5.2             | 0               | 2               | 3               | 0               | 6.8              | 5.8              | 0                |
| 14      | man    | 0.6            | 0              | 0              | 1.9             | 5               | 1.3             | 1.5             | 2               | 0.9             | 4                | 4.5              | 2.4              |
| 15      | man    | 0              | 6.6            | 0.1            | 2.6             | 4.9             | 1               | 5               | 3.3             | 0.6             | 5.5              | 8.9              | 1.6              |
| 16      | woman  | 8.3            | 0              | 0              | 5.4             | 0.8             | 0               | 7.1             | 1               | 0               | 6.7              | 1.5              | 0                |
| 17      | man    | 1              | 0.6            | 0.4            | 6.7             | 6.8             | 6.2             | 3               | 6.5             | 2.7             | 7.2              | 7.8              | 7.1              |
| 18      | man    | 6              | 2              | 0.4            | 9.3             | 3.5             | 1               | 7.6             | 8.5             | 0.6             | 4.5              | 3.9              | 0.7              |
| 19      | woman  | 0              | 0              | 0              | 3.2             | 1.4             | 0.4             | 2.2             | 1.5             | 0.4             | 8.3              | 6.4              | 0.1              |
| 20      | woman  | 6.7            | 0              | 0              | 8.2             | 3.1             | 1.6             | 8               | 2.9             | 0.8             | 8.2              | 6.9              | 1.8              |
| 21      | woman  | 2.8            | 0              | 0              | 3.9             | 3               | 0.1             | 3.4             | 1.9             | 0               | 4.4              | 5.3              | 0                |
| 22      | woman  | 5.3            | 2.1            | 0              | 6.8             | 1.5             | 0               | 5.8             | 1.4             | 0.8             | 7.9              | 1.3              | 0.6              |
| 23      | woman  | 9.3            | 2.1            | 0              | 7.8             | 6.9             | 0               | 7.7             | 2.1             | 0               | 9.6              | 8.6              | 0.8              |
| 24      | man    | 1.3            | 0.8            | 0              | 9.4             | 6.3             | 0.4             | 6.7             | 2.4             | 0.4             | 10               | 9.4              | 0.9              |
| 25      | woman  | 0              | 0              | 0              | 2.5             | 0               | 0               | 0               | 0               | 0.1             | 5.1              | 0                | 0                |
| 26      | woman  | 2.5            | 0              | 0              | 8.5             | 7.1             | 0               | 8.1             | 2.3             | 0               | 9.1              | 1.7              | 0                |
| 27      | man    | 7.3            | 0.9            | 0              | 7.2             | 2.9             | 0               | 5.8             | 1               | 0.5             | 9.3              | 7.9              | 0.5              |
| 28      | woman  | 8.7            | 0              | 0              | 1.8             | 2.3             | 0               | 7.5             | 0.8             | 0               | 8                | 2                | 0                |
| 29      | woman  | 7.3            | 4.2            | 1.2            | 7               | 6.6             | 0.5             | 6.5             | 6               | 0.6             | 9.4              | 8.4              | 2.6              |
| 30      | man    | 7.8            | 1.7            | 0.8            | 6.3             | 5.9             | 1.7             | 7.4             | 4.6             | 2               | 8                | 6.3              | 1.2              |
| Average |        | 4.1            | 1.1            | 0.2            | 5.9             | 3.6             | 0.6             | 5.1             | 2.4             | 0.5             | 7.0              | 4.8              | 0.9              |
| SD      |        | 3.4            | 1.9            | 0.3            | 2.9             | 2.6             | 1.2             | 2.8             | 2.5             | 0.7             | 2.1              | 3.1              | 1.4              |

## (c) Slight warmth

| ID      | gender | S <sup>T</sup> | F <sup>T</sup> | A <sup>T</sup> | S <sup>TV</sup> | F <sup>TV</sup> | A <sup>TV</sup> | S <sup>TA</sup> | F <sup>TA</sup> | A <sup>TA</sup> | S <sup>TVA</sup> | F <sup>TVA</sup> | A <sup>TVA</sup> |
|---------|--------|----------------|----------------|----------------|-----------------|-----------------|-----------------|-----------------|-----------------|-----------------|------------------|------------------|------------------|
| 1       | woman  | 0.1            | 0.1            | 0              | 0.9             | 9.9             | 0.1             | 7.4             | 9.8             | 0.2             | 3                | 9.6              | 0.2              |
| 2       | man    | 7.3            | 6.1            | 0.1            | 5.7             | 10              | 0               | 7.7             | 8               | 0               | 8.5              | 4.5              | 0.1              |
| 3       | man    | 5.3            | 4.7            | 0              | 2.6             | 7.6             | 0.5             | 5.4             | 6.9             | 0               | 3.6              | 8.9              | 1.4              |
| 4       | man    | 1.8            | 4.5            | 0              | 8.6             | 6.4             | 0.9             | 2.6             | 2.5             | 0               | 10               | 8                | 1.6              |
| 5       | man    | 5.3            | 1.4            | 0              | 7.5             | 8.5             | 0               | 4.9             | 3.2             | 0               | 7.3              | 7.8              | 1.4              |
| 6       | woman  | 2.7            | 4.7            | 1              | 8.3             | 8               | 0.9             | 6.5             | 6.9             | 0.6             | 7.6              | 7.5              | 1.5              |
| 7       | man    | 3.5            | 4.9            | 0              | 7.1             | 5.3             | 0               | 3.4             | 5.2             | 0               | 5                | 6.8              | 0                |
| 8       | man    | 5.5            | 3.5            | 0              | 5.6             | 6.3             | 0               | 2.5             | 2.2             | 0               | 5.5              | 5.3              | 0.2              |
| 9       | woman  | 2.1            | 0.9            | 0              | 6.5             | 5.9             | 0               | 5.1             | 6.7             | 1               | 5.4              | 3.3              | 0                |
| 10      | man    | 6.7            | 5.1            | 0              | 7               | 7               | 0               | 4.3             | 8.8             | 0               | 7.3              | 8                | 0                |
| 11      | man    | 0              | 0              | 0              | 0               | 4.8             | 0               | 0               | 4.9             | 0               | 5                | 3.7              | 0                |
| 12      | woman  | 3.3            | 6.9            | 0.8            | 4.2             | 6.2             | 0.9             | 6               | 7.4             | 1.7             | 3.7              | 3.7              | 2.5              |
| 13      | woman  | 2              | 0              | 0              | 0               | 8               | 0               | 3.5             | 7               | 0               | 6.5              | 8.2              | 0.1              |
| 14      | man    | 0.8            | 0              | 0              | 2               | 5               | 2.5             | 1.9             | 2               | 1.4             | 3.6              | 4.5              | 3.2              |
| 15      | man    | 0              | 6.7            | 0              | 4.9             | 7               | 1               | 6.2             | 5.4             | 1.9             | 5.8              | 7.5              | 2                |
| 16      | woman  | 2              | 8              | 0.2            | 4.3             | 9.1             | 1.3             | 4.6             | 7.7             | 0.9             | 3.3              | 8                | 1.3              |
| 17      | man    | 2              | 0.9            | 0.8            | 6.4             | 7               | 6               | 2               | 5.5             | 0.7             | 5.5              | 7.3              | 6.8              |
| 18      | man    | 5.7            | 8.1            | 0.4            | 9.4             | 6.6             | 0.6             | 7.9             | 9               | 0.7             | 2.7              | 8.9              | 0.7              |
| 19      | woman  | 0              | 1.2            | 0              | 3.7             | 3.4             | 0.6             | 2.2             | 1.3             | 0.5             | 7.3              | 6.5              | 0.2              |
| 20      | woman  | 2.5            | 8              | 2              | 1.9             | 10              | 5.2             | 1               | 7.7             | 2.7             | 6.2              | 9                | 4.3              |
| 21      | woman  | 2.6            | 5.8            | 0              | 2               | 8.6             | 0               | 2.1             | 8.1             | 0               | 2.8              | 8.5              | 0                |
| 22      | woman  | 5.3            | 6.8            | 0              | 6.5             | 6.8             | 0.2             | 5.8             | 7.5             | 0.8             | 5.5              | 6                | 0.9              |
| 23      | woman  | 7.2            | 5.1            | 0              | 6               | 5.3             | 0               | 2.2             | 1.2             | 0               | 8.6              | 6.2              | 0                |
| 24      | man    | 1.3            | 8              | 0              | 7.3             | 7               | 0.4             | 6.8             | 8.5             | 0.4             | 9.8              | 9.5              | 1                |
| 25      | woman  | 0              | 0              | 0              | 0               | 0               | 0               | 0.1             | 8               | 0               | 0.2              | 0                | 0                |
| 26      | woman  | 7.9            | 6.1            | 0              | 8.5             | 7.3             | 0               | 6.1             | 8.1             | 0               | 9.2              | 8.7              | 0                |
| 27      | man    | 6.7            | 1.4            | 0              | 2.6             | 5.5             | 0               | 4.9             | 1.5             | 1               | 6.8              | 6.7              | 1                |
| 28      | woman  | 6.3            | 4.1            | 0              | 3.8             | 4.2             | 0               | 8.3             | 5.5             | 0.2             | 6.4              | 8.9              | 0                |
| 29      | woman  | 3              | 6              | 1.2            | 4.9             | 6.6             | 2.4             | 4.3             | 6.5             | 1.4             | 6.7              | 8.4              | 2.1              |
| 30      | man    | 7.8            | 2              | 0.8            | 5               | 7.4             | 1.2             | 6.5             | 5.7             | 1.6             | 6.8              | 5                | 1.2              |
| Average |        | 3.6            | 4.0            | 0.2            | 4.8             | 6.7             | 0.8             | 4.4             | 6.0             | 0.6             | 5.9              | 6.8              | 1.1              |
| SD      |        | 2.6            | 2.8            | 0.5            | 2.7             | 2.1             | 1.5             | 2.3             | 2.5             | 0.7             | 2.3              | 2.2              | 1.5              |

## (d) Warmth

| ID      | gender | S <sup>T</sup> | F <sup>T</sup> | A <sup>T</sup> | S <sup>TV</sup> | F <sup>TV</sup> | A <sup>TV</sup> | S <sup>TA</sup> | F <sup>TA</sup> | A <sup>TA</sup> | S <sup>TVA</sup> | F <sup>TVA</sup> | A <sup>TVA</sup> |
|---------|--------|----------------|----------------|----------------|-----------------|-----------------|-----------------|-----------------|-----------------|-----------------|------------------|------------------|------------------|
| 1       | woman  | 0.1            | 7.3            | 0.1            | 0.2             | 9.9             | 0               | 0.3             | 9.8             | 0               | 0.8              | 9.9              | 0.1              |
| 2       | man    | 4.9            | 1.8            | 0.6            | 0               | 9.4             | 0               | 7.2             | 0.6             | 0               | 2.3              | 10               | 0                |
| 3       | man    | 3.6            | 4.7            | 1.8            | 4.2             | 6.3             | 0               | 4.3             | 6.2             | 0.4             | 5                | 8.8              | 0.4              |
| 4       | man    | 6.1            | 7.2            | 0              | 5.8             | 8.1             | 0               | 3.9             | 0               | 7.8             | 9.3              | 8.5              | 7.5              |
| 5       | man    | 4.9            | 8.2            | 0.9            | 7.9             | 10              | 3               | 2               | 8.3             | 1.4             | 7.8              | 10               | 5                |
| 6       | woman  | 6.7            | 6.3            | 0              | 7.5             | 7               | 0.1             | 6.5             | 6.1             | 0               | 6.1              | 7.2              | 0                |
| 7       | man    | 2              | 6.9            | 0              | 5               | 6.1             | 1.2             | 0               | 1.4             | 5.1             | 0                | 6.3              | 5.2              |
| 8       | man    | 4.7            | 4.1            | 2.9            | 5.7             | 4               | 0               | 3.7             | 5.8             | 0               | 4.7              | 5.8              | 1.5              |
| 9       | woman  | 1.6            | 6.8            | 0              | 7.2             | 7.7             | 0               | 5.1             | 6               | 0               | 6.4              | 3.2              | 0                |
| 10      | man    | 5.1            | 7.6            | 0              | 6.4             | 8.5             | 0               | 5               | 9.4             | 0               | 2.7              | 9                | 0                |
| 11      | man    | 0              | 8.6            | 0              | 0               | 10              | 0               | 0               | 8.2             | 0               | 6.3              | 9.1              | 0                |
| 12      | woman  | 1.9            | 8              | 1              | 2               | 6.8             | 2               | 1               | 6.8             | 2.7             | 2.7              | 5.9              | 1.3              |
| 13      | woman  | 3.3            | 10             | 0              | 0               | 10              | 0.2             | 7               | 10              | 0.2             | 6.5              | 7.4              | 0.2              |
| 14      | man    | 4.9            | 1.8            | 0              | 6.5             | 6               | 2.8             | 1.6             | 2.4             | 1.9             | 5.3              | 5.3              | 2.8              |
| 15      | man    | 0              | 9.3            | 0.3            | 3               | 7.7             | 0               | 2.3             | 9.5             | 0.5             | 4.5              | 8.3              | 0                |
| 16      | woman  | 2              | 10             | 1.1            | 3.8             | 10              | 0.2             | 2.1             | 9.3             | 1               | 3.1              | 8.9              | 2.1              |
| 17      | man    | 0              | 1              | 0              | 0               | 1.3             | 0.5             | 1.1             | 5.3             | 0               | 3.5              | 8                | 0.6              |
| 18      | man    | 3.5            | 8.8            | 1.5            | 5.3             | 7.1             | 0.9             | 3.3             | 8.1             | 0.5             | 1.7              | 7.6              | 1                |
| 19      | woman  | 4.8            | 6.8            | 5.2            | 3               | 8.1             | 0.8             | 2.7             | 5.8             | 5.1             | 2                | 6.5              | 4.9              |
| 20      | woman  | 1.3            | 8.4            | 2.9            | 0.9             | 9.4             | 3.3             | 0               | 9               | 5.7             | 4.2              | 10               | 3.9              |
| 21      | woman  | 0              | 10             | 0              | 0               | 10              | 0               | 0.1             | 8.8             | 0               | 2.1              | 9.4              | 0                |
| 22      | woman  | 4.8            | 3.4            | 0.2            | 5.7             | 7.8             | 0.1             | 5               | 3               | 1.7             | 6.1              | 7.5              | 1                |
| 23      | woman  | 5.6            | 6.3            | 0              | 3.1             | 2.2             | 0               | 3.3             | 0.9             | 0               | 6.3              | 4.9              | 0                |
| 24      | man    | 4.8            | 6.8            | 0              | 8.4             | 7.7             | 0.7             | 6.9             | 8.2             | 0.4             | 9.1              | 9.6              | 0.5              |
| 25      | woman  | 0              | 10             | 0              | 0               | 0               | 0.2             | 0               | 10              | 0               | 0                | 5.2              | 0                |
| 26      | woman  | 7.3            | 6.5            | 0              | 8.9             | 10              | 0.2             | 7.6             | 7.8             | 1.7             | 10               | 9.8              | 0                |
| 27      | man    | 5.9            | 5              | 0              | 4.9             | 5.2             | 0               | 5.8             | 2.5             | 0               | 7                | 7.5              | 0.2              |
| 28      | woman  | 7.7            | 4.8            | 0              | 7.2             | 7.6             | 0               | 7.8             | 7.7             | 0               | 7.6              | 7                | 0                |
| 29      | woman  | 3.6            | 7.4            | 2.2            | 4.1             | 7.5             | 1.4             | 3.8             | 8.4             | 3.8             | 5.6              | 8.3              | 3.6              |
| 30      | man    | 4.8            | 6.1            | 1.1            | 3.8             | 6.4             | 1.3             | 4.3             | 4               | 1.6             | 2.9              | 6.2              | 1.2              |
| Average |        | 3.5            | 6.7            | 0.7            | 4.0             | 7.3             | 0.6             | 3.5             | 6.3             | 1.4             | 4.7              | 7.7              | 1.4              |
| SD      |        | 2.4            | 2.5            | 1.2            | 2.9             | 2.6             | 1.0             | 2.5             | 3.1             | 2.1             | 2.7              | 1.8              | 2.0              |

## (e) Coldness

| ID      | gender | S <sup>T</sup> | F <sup>T</sup> | A <sup>T</sup> | S <sup>TV</sup> | F <sup>TV</sup> | A <sup>TV</sup> | S <sup>TA</sup> | F <sup>TA</sup> | A <sup>TA</sup> | S <sup>TVA</sup> | F <sup>TVA</sup> | A <sup>TVA</sup> |
|---------|--------|----------------|----------------|----------------|-----------------|-----------------|-----------------|-----------------|-----------------|-----------------|------------------|------------------|------------------|
| 1       | woman  | 9.2            | 0.1            | 0.1            | 0.1             | 0.1             | 0.1             | 0.1             | 0.1             | 0.1             | 1.7              | 0.1              | 0.1              |
| 2       | man    | 2.5            | 0              | 0              | 5               | 0               | 0               | 8               | 0               | 0               | 1.1              | 0                | 0                |
| 3       | man    | 3.5            | 2              | 1.7            | 3.8             | 1.5             | 4.8             | 4               | 4.9             | 5               | 0.8              | 0                | 3.4              |
| 4       | man    | 6.8            | 1.2            | 8.7            | 0.2             | 0               | 1.5             | 2.8             | 1               | 8.8             | 0.5              | 0                | 6                |
| 5       | man    | 5              | 0              | 8.7            | 1.5             | 0               | 2.2             | 1.6             | 0               | 8.1             | 2                | 0                | 0                |
| 6       | woman  | 2              | 0              | 7.5            | 1.9             | 0.1             | 7.8             | 1.9             | 0.1             | 9.3             | 1.6              | 0.2              | 8.3              |
| 7       | man    | 7.2            | 3              | 7.1            | 2.1             | 2.2             | 2.3             | 0               | 0               | 5.1             | 6.9              | 0                | 5.5              |
| 8       | man    | 6.9            | 5.7            | 10             | 3.6             | 5               | 10              | 7.9             | 3.4             | 8.8             | 4.6              | 2.9              | 10               |
| 9       | woman  | 1.5            | 0              | 2.3            | 0               | 0               | 0               | 9.8             | 0               | 2.6             | 0                | 0                | 10               |
| 10      | man    | 0              | 0              | 3.7            | 0               | 0.3             | 3.4             | 0               | 0.1             | 5.4             | 0                | 0.7              | 3.2              |
| 11      | man    | 2              | 0              | 3.2            | 0               | 0               | 0.1             | 7.6             | 0.1             | 1.1             | 0                | 0                | 3.6              |
| 12      | woman  | 7              | 2              | 5.3            | 7.6             | 3.4             | 6.5             | 1               | 2.3             | 7.2             | 7.8              | 1.9              | 6.7              |
| 13      | woman  | 0              | 0              | 10             | 8.5             | 0               | 5.3             | 0               | 0               | 4.9             | 2.6              | 0.2              | 10               |
| 14      | man    | 3.8            | 5              | 6.5            | 2.7             | 1.9             | 5.8             | 4.3             | 4.1             | 7.1             | 1.5              | 3.8              | 4                |
| 15      | man    | 10             | 0.7            | 4.9            | 7.5             | 0.6             | 8.6             | 8.6             | 0.3             | 8.5             | 3.8              | 0.2              | 6.7              |
| 16      | woman  | 10             | 0              | 4              | 8               | 0               | 8.3             | 8.2             | 1.8             | 6.3             | 1                | 2.6              | 8.1              |
| 17      | man    | 0.5            | 0              | 0              | 1.3             | 0               | 0.4             | 8.9             | 1.5             | 1.5             | 6.3              | 0                | 5.5              |
| 18      | man    | 5.9            | 1.2            | 9.5            | 3.9             | 2.5             | 8.5             | 7.3             | 1               | 5.6             | 9.4              | 1.3              | 7                |
| 19      | woman  | 6              | 3.4            | 5              | 3.7             | 1.5             | 5               | 6.7             | 3.4             | 4.9             | 6.3              | 0.6              | 4.9              |
| 20      | woman  | 9              | 2.8            | 4.8            | 8.9             | 0               | 4.7             | 9.2             | 1.2             | 4.5             | 5                | 0.1              | 7.4              |
| 21      | woman  | 10             | 0              | 10             | 9.9             | 0.1             | 8               | 10              | 0               | 8.6             | 6.5              | 0.1              | 7.9              |
| 22      | woman  | 6.3            | 2.6            | 3.8            | 4               | 1.4             | 5.9             | 5.4             | 3.2             | 5.6             | 2.3              | 2.5              | 7                |
| 23      | woman  | 2              | 0              | 1.8            | 4.2             | 0               | 2.9             | 5               | 0               | 0.9             | 0.5              | 0                | 0                |
| 24      | man    | 6.6            | 1.7            | 10             | 1.7             | 2.7             | 8.2             | 1.1             | 1.2             | 6.4             | 3.1              | 0.9              | 9.6              |
| 25      | woman  | 0              | 0              | 7.6            | 0.1             | 0.1             | 0               | 0               | 0               | 0               | 7.6              | 0                | 0                |
| 26      | woman  | 0.2            | 1.8            | 10             | 0               | 0               | 1.8             | 0               | 0               | 3.4             | 0                | 0                | 8                |
| 27      | man    | 0              | 0              | 7.1            | 1.9             | 1.4             | 6.2             | 0               | 0               | 7.5             | 0                | 2.8              | 3.8              |
| 28      | woman  | 2.5            | 2.8            | 8              | 2               | 0               | 10              | 0               | 1               | 8.2             | 0.7              | 1                | 10               |
| 29      | woman  | 6.6            | 6.4            | 8.1            | 5.8             | 1.5             | 8.2             | 4               | 2.7             | 8.6             | 2.6              | 1.4              | 7.3              |
| 30      | man    | 1.8            | 1.2            | 0.6            | 1.2             | 1.7             | 0.8             | 3.6             | 1               | 0.5             | 1                | 1.8              | 1.4              |
| Average |        | 4.5            | 1.5            | 5.7            | 3.4             | 0.9             | 4.6             | 4.2             | 1.1             | 5.2             | 2.9              | 0.8              | 5.5              |
| SD      |        | 3.4            | 1.8            | 3.4            | 3.0             | 1.3             | 3.4             | 3.6             | 1.4             | 3.1             | 2.8              | 1.1              | 3.3              |

## (f) Softness

| ID      | gender | S <sup>T</sup> | F <sup>T</sup> | A <sup>T</sup> | S <sup>TV</sup> | F <sup>TV</sup> | A <sup>TV</sup> | S <sup>TA</sup> | F <sup>TA</sup> | A <sup>TA</sup> | S <sup>TVA</sup> | F <sup>TVA</sup> | A <sup>TVA</sup> |
|---------|--------|----------------|----------------|----------------|-----------------|-----------------|-----------------|-----------------|-----------------|-----------------|------------------|------------------|------------------|
| 1       | woman  | 8.4            | 9.9            | 0.2            | 9.8             | 9.9             | 0.1             | 7.3             | 9.9             | 0.2             | 7.6              | 9.8              | 0                |
| 2       | man    | 2.4            | 10             | 0.2            | 6.2             | 10              | 0.1             | 7.4             | 10              | 0               | 8.7              | 10               | 0                |
| 3       | man    | 9.3            | 10             | 0.7            | 7               | 10              | 0               | 7.6             | 9.1             | 0               | 7.4              | 9.1              | 1.3              |
| 4       | man    | 8.7            | 8.8            | 0              | 10              | 8               | 0               | 8.8             | 9.8             | 0               | 10               | 9.2              | 0.2              |
| 5       | man    | 5.1            | 8.1            | 0              | 7.8             | 8               | 0               | 8.5             | 7.1             | 0               | 8.5              | 4.7              | 2.3              |
| 6       | woman  | 8.1            | 10             | 0.1            | 8.7             | 10              | 0               | 8.2             | 9.9             | 0.1             | 7.8              | 10               | 1.2              |
| 7       | man    | 8.3            | 8              | 0              | 10              | 6.1             | 0               | 8.3             | 9.9             | 0               | 8.2              | 8.1              | 0                |
| 8       | man    | 6.8            | 5.6            | 0              | 6.4             | 4               | 0               | 6.1             | 4.9             | 0               | 8.5              | 6                | 0                |
| 9       | woman  | 8              | 10             | 0              | 7.5             | 8.5             | 2               | 5.1             | 10              | 0               | 6.2              | 6.7              | 0                |
| 10      | man    | 9.1            | 10             | 0              | 7.7             | 9.3             | 0.1             | 2               | 9.7             | 0               | 8.9              | 9.8              | 0                |
| 11      | man    | 1.7            | 10             | 0              | 2               | 9.9             | 0               | 6.1             | 10              | 0               | 6.6              | 10               | 0                |
| 12      | woman  | 7.8            | 9.3            | 1              | 6.6             | 7.8             | 0               | 7.3             | 7.5             | 1.6             | 8.2              | 8.8              | 1.4              |
| 13      | woman  | 8              | 10             | 0.2            | 6.5             | 10              | 1               | 7.1             | 9.8             | 0.2             | 7.8              | 9.8              | 0.2              |
| 14      | man    | 6.9            | 5.4            | 0.8            | 7.6             | 5.4             | 2.3             | 4.2             | 3.9             | 2.1             | 6.4              | 4.3              | 4.4              |
| 15      | man    | 0              | 9.9            | 0              | 7.6             | 8.3             | 0.2             | 9.3             | 9.7             | 0.4             | 0.6              | 9.8              | 0                |
| 16      | woman  | 1.7            | 10             | 1.5            | 4.1             | 8               | 2.3             | 1.1             | 8.9             | 1.9             | 9.2              | 2.2              | 1.1              |
| 17      | man    | 0.4            | 10             | 0              | 0.5             | 10              | 0               | 0.6             | 10              | 0               | 1.1              | 8.8              | 0                |
| 18      | man    | 8.1            | 7.3            | 0.9            | 9.3             | 7.2             | 0.3             | 0.6             | 6.3             | 0.4             | 9                | 7.9              | 0.5              |
| 19      | woman  | 8.1            | 9.5            | 0              | 3.1             | 8.5             | 0.6             | 7.1             | 9.4             | 0.6             | 8.4              | 9.4              | 0.5              |
| 20      | woman  | 3.7            | 10             | 0              | 5.9             | 10              | 0               | 7.2             | 9.9             | 0               | 6.4              | 9.9              | 0                |
| 21      | woman  | 10             | 7.9            | 0.2            | 9.9             | 10              | 0               | 8.5             | 10              | 0               | 9.2              | 10               | 0                |
| 22      | woman  | 7.6            | 6.7            | 0.4            | 6.3             | 7.9             | 0               | 6.6             | 7.5             | 1.9             | 7.5              | 7.9              | 1.5              |
| 23      | woman  | 9.1            | 10             | 0              | 8.5             | 10              | 0               | 8.9             | 10              | 0               | 8.6              | 10               | 0                |
| 24      | man    | 8.7            | 10             | 0              | 8.8             | 8               | 0               | 9.5             | 9.7             | 1.1             | 6.8              | 9.1              | 0.3              |
| 25      | woman  | 10             | 10             | 0              | 10              | 10              | 0               | 10              | 10              | 0               | 10               | 10               | 0                |
| 26      | woman  | 7.2            | 7.8            | 0              | 8.8             | 10              | 0               | 10              | 10              | 0               | 9.9              | 10               | 0                |
| 27      | man    | 6.9            | 9.8            | 0.6            | 9.2             | 9.5             | 0               | 9.4             | 9               | 0.3             | 9                | 10               | 0                |
| 28      | woman  | 10             | 9.1            | 0.1            | 8.8             | 7.5             | 0               | 8.4             | 4.2             | 0               | 9.8              | 6.7              | 0.2              |
| 29      | woman  | 8              | 7.8            | 1.3            | 8               | 7.3             | 1.3             | 6.6             | 7.5             | 1.8             | 8.8              | 8.3              | 1.9              |
| 30      | man    | 8.5            | 9.2            | 0.6            | 7.9             | 5.5             | 1               | 2.1             | 3.5             | 0.5             | 1.2              | 8.5              | 1.3              |
| Average |        | 6.9            | 9.0            | 0.3            | 7.4             | 8.5             | 0.4             | 6.7             | 8.6             | 0.4             | 7.5              | 8.5              | 0.6              |
| SD      |        | 2.9            | 1.4            | 0.4            | 2.4             | 1.6             | 0.7             | 2.8             | 2.1             | 0.7             | 2.5              | 2.0              | 1.0              |

## (g) Hardness

| ID      | gender | $S^T$ | $F^T$ | $A^T$ | $S^{TV}$ | $F^{TV}$ | $A^{TV}$ | $S^{TA}$ | $F^{TA}$ | $A^{TA}$ | $S^{TVA}$ | $F^{TVA}$ | $A^{TVA}$ |
|---------|--------|-------|-------|-------|----------|----------|----------|----------|----------|----------|-----------|-----------|-----------|
| 1       | woman  | 2.3   | 0.1   | 9.9   | 0.1      | 0        | 9.8      | 0.3      | 0.2      | 9.8      | 0.2       | 0.2       | 9.8       |
| 2       | man    | 3.5   | 0     | 10    | 1.1      | 0        | 9.8      | 0        | 0        | 10       | 0         | 0         | 10        |
| 3       | man    | 5.4   | 0     | 8.8   | 5.9      | 0        | 10       | 4.9      | 0.9      | 10       | 0.7       | 1.5       | 9.3       |
| 4       | man    | 3.5   | 0     | 10    | 0        | 0        | 8.4      | 2        | 0        | 10       | 1.1       | 0.1       | 10        |
| 5       | man    | 5     | 3.3   | 10    | 1.3      | 2        | 0        | 6.8      | 2.9      | 10       | 2.2       | 2.1       | 8.2       |
| 6       | woman  | 1.5   | 0.2   | 9.8   | 1.8      | 0        | 10       | 0.7      | 0        | 10       | 1.1       | 0         | 9.9       |
| 7       | man    | 0     | 0     | 10    | 0        | 0        | 10       | 1.1      | 0        | 10       | 0         | 1.7       | 10        |
| 8       | man    | 0     | 3.6   | 10    | 5.2      | 0        | 10       | 5.7      | 0        | 10       | 0         | 0         | 10        |
| 9       | woman  | 2     | 0     | 10    | 1.5      | 2        | 10       | 5        | 0        | 9.3      | 4.6       | 0.2       | 10        |
| 10      | man    | 0.2   | 0.2   | 10    | 0        | 0.3      | 9.7      | 0.2      | 0        | 9.8      | 0         | 0.9       | 10        |
| 11      | man    | 6.9   | 0.1   | 10    | 3.5      | 0.1      | 10       | 6.5      | 0        | 10       | 1.1       | 0.1       | 10        |
| 12      | woman  | 2.5   | 0.5   | 8.7   | 2.6      | 1.2      | 8.3      | 3        | 2.2      | 8.4      | 1.7       | 1.8       | 9.2       |
| 13      | woman  | 0.2   | 0     | 9.8   | 2        | 0        | 10       | 0        | 0        | 10       | 0         | 2.9       | 10        |
| 14      | man    | 4.5   | 4.7   | 8.9   | 3        | 2.7      | 5        | 3.4      | 3        | 7.5      | 1.1       | 2.3       | 4.4       |
| 15      | man    | 10    | 0     | 10    | 1.1      | 1.8      | 9.8      | 0.5      | 0.2      | 9.8      | 8         | 0.4       | 10        |
| 16      | woman  | 8.7   | 0     | 10    | 7.5      | 0.2      | 9.9      | 7.1      | 1.9      | 10       | 2.2       | 1.4       | 10        |
| 17      | man    | 9     | 0.5   | 10    | 8.6      | 0        | 10       | 8.8      | 0.2      | 9.3      | 8.6       | 1.2       | 10        |
| 18      | man    | 0.5   | 2     | 9.6   | 1.5      | 2.1      | 9.5      | 4.9      | 2.5      | 9.4      | 1.2       | 1         | 9.7       |
| 19      | woman  | 2.4   | 0.2   | 10    | 7        | 0.7      | 9.5      | 0.4      | 0.5      | 9.4      | 0.3       | 0.5       | 9.7       |
| 20      | woman  | 8.2   | 0     | 10    | 5.2      | 0        | 9.9      | 1.4      | 0        | 10       | 3.6       | 0         | 10        |
| 21      | woman  | 0     | 0.1   | 10    | 0        | 0        | 10       | 1.6      | 0        | 10       | 0         | 0         | 9.9       |
| 22      | woman  | 3.9   | 0.3   | 10    | 3.1      | 2.3      | 9.7      | 2.9      | 2.5      | 8.1      | 2.2       | 2.3       | 9.5       |
| 23      | woman  | 0     | 0     | 10    | 0        | 0        | 9.1      | 0        | 0        | 10       | 0         | 0         | 9.9       |
| 24      | man    | 6.5   | 0.2   | 10    | 5.6      | 1.5      | 10       | 1.7      | 3.3      | 9.7      | 6.7       | 2.1       | 10        |
| 25      | woman  | 0     | 0     | 10    | 0        | 0        | 10       | 0.3      | 0        | 10       | 0         | 0         | 10        |
| 26      | woman  | 8     | 2.4   | 10    | 1.5      | 0.9      | 9.9      | 0        | 2.1      | 10       | 0.9       | 2.3       | 10        |
| 27      | man    | 0     | 0.7   | 9     | 0        | 3.4      | 9.2      | 0        | 0.5      | 10       | 0         | 1.2       | 8.5       |
| 28      | woman  | 0     | 1.2   | 10    | 0        | 0        | 10       | 0        | 3.6      | 8.8      | 0         | 2.5       | 10        |
| 29      | woman  | 3.9   | 2     | 7.3   | 2.2      | 2.5      | 8.4      | 2        | 1.9      | 8.5      | 0.9       | 1.5       | 8         |
| 30      | man    | 1.7   | 1     | 8.9   | 1.4      | 1.1      | 9.1      | 1.4      | 1.1      | 9.4      | 1         | 1.5       | 9.5       |
| Average |        | 3.3   | 0.8   | 9.7   | 2.4      | 0.8      | 9.2      | 2.4      | 1.0      | 9.6      | 1.6       | 1.1       | 9.5       |
| SD      |        | 3.2   | 1.3   | 0.6   | 2.5      | 1.0      | 2.0      | 2.6      | 1.2      | 0.7      | 2.4       | 0.9       | 1.1       |

## (h) Smoothness

| ID      | gender | $S^T$ | $F^T$ | $A^T$ | $S^{TV}$ | $F^{TV}$ | $A^{TV}$ | $S^{TA}$ | $F^{TA}$ | $A^{TA}$ | $S^{TVA}$ | $F^{TVA}$ | $A^{TVA}$ |
|---------|--------|-------|-------|-------|----------|----------|----------|----------|----------|----------|-----------|-----------|-----------|
| 1       | woman  | 8.7   | 9.9   | 0.2   | 0.2      | 0.2      | 0        | 0.3      | 9.8      | 0.2      | 7         | 9.8       | 0.1       |
| 2       | man    | 8.7   | 4.3   | 0     | 4.8      | 0.5      | 0        | 6.2      | 0.1      | 0        | 7.9       | 0.7       | 0         |
| 3       | man    | 7.4   | 7.8   | 0     | 9.5      | 9.4      | 0        | 9        | 6.8      | 0        | 8.9       | 3.5       | 0.7       |
| 4       | man    | 8     | 7.1   | 0     | 8.4      | 6.9      | 0        | 8        | 8.1      | 0        | 10        | 3.7       | 0         |
| 5       | man    | 7.6   | 2     | 0     | 8        | 2.4      | 0        | 6.9      | 1.7      | 0.3      | 5.2       | 2.5       | 0         |
| 6       | woman  | 6.8   | 5.3   | 0.1   | 8        | 1.7      | 0        | 7.4      | 7.1      | 0.7      | 6.8       | 7.8       | 0         |
| 7       | man    | 7.4   | 8.8   | 0     | 9.5      | 5.3      | 0        | 7.7      | 10       | 0        | 7.9       | 10        | 0         |
| 8       | man    | 4.8   | 2.4   | 0     | 8.5      | 10       | 0        | 4.2      | 2.6      | 0        | 5.6       | 5.1       | 0         |
| 9       | woman  | 7.3   | 5     | 0     | 5.7      | 3.3      | 0        | 6.3      | 7        | 0        | 2.9       | 3.9       | 0         |
| 10      | man    | 3.6   | 7.1   | 0     | 10       | 5.5      | 0        | 2.7      | 5.8      | 0        | 3         | 7         | 0         |
| 11      | man    | 6.4   | 0     | 0.1   | 5.1      | 7.5      | 0.2      | 7        | 1.2      | 0        | 6.6       | 0         | 0.2       |
| 12      | woman  | 7.5   | 1     | 1.5   | 7.8      | 6.7      | 0.4      | 8.2      | 3.9      | 2.3      | 9.5       | 5.4       | 0.4       |
| 13      | woman  | 0.1   | 5.4   | 0     | 7.4      | 6        | 0        | 5        | 0        | 0        | 6.7       | 6.7       | 0.1       |
| 14      | man    | 2.7   | 1.1   | 0.4   | 7.2      | 3.8      | 2.4      | 4.1      | 2.2      | 1.8      | 4.2       | 3.1       | 1.9       |
| 15      | man    | 5.2   | 8     | 0.2   | 7.3      | 7.5      | 0.2      | 7.4      | 8        | 0.4      | 2         | 8.3       | 0.1       |
| 16      | woman  | 8.3   | 6     | 1.2   | 6.7      | 7.1      | 0        | 9.3      | 9        | 0.2      | 2.7       | 7.3       | 0         |
| 17      | man    | 8.4   | 10    | 0     | 9.6      | 10       | 0        | 8.9      | 10       | 0        | 8.3       | 8.4       | 0         |
| 18      | man    | 8.6   | 8.1   | 0.5   | 7.9      | 7.8      | 2.1      | 6.6      | 7.4      | 0.2      | 8.2       | 8.5       | 0.3       |
| 19      | woman  | 7.1   | 2.2   | 0     | 3.1      | 0.7      | 0.2      | 7.1      | 3.6      | 0.7      | 7.7       | 3.6       | 0.3       |
| 20      | woman  | 6.4   | 1.6   | 0     | 9        | 6.7      | 0        | 7.7      | 6.9      | 0        | 6.7       | 8.5       | 0         |
| 21      | woman  | 8.2   | 6.2   | 0     | 8.6      | 5.5      | 0        | 8.1      | 6.2      | 0        | 5.9       | 5.7       | 0         |
| 22      | woman  | 6.5   | 4.1   | 0     | 6.5      | 8        | 0.3      | 5.3      | 6.3      | 0.6      | 6.2       | 3.8       | 0.8       |
| 23      | woman  | 9.6   | 3.2   | 0     | 10       | 6.1      | 0        | 8.9      | 5.1      | 0        | 7         | 4.2       | 0         |
| 24      | man    | 6.4   | 2.4   | 0.9   | 7        | 1.5      | 0.5      | 8.4      | 2.8      | 0.3      | 6.4       | 3.8       | 0.5       |
| 25      | woman  | 5     | 0     | 0     | 4.8      | 0        | 0        | 0.3      | 0        | 0        | 7.6       | 0         | 0         |
| 26      | woman  | 8.3   | 4.9   | 0     | 10       | 2.7      | 0        | 10       | 2        | 0        | 10        | 5.4       | 0         |
| 27      | man    | 4.6   | 8.2   | 0     | 6        | 7.5      | 0        | 7        | 9.2      | 0        | 5.6       | 8.2       | 0         |
| 28      | woman  | 5.1   | 0     | 0     | 7.8      | 0.6      | 0        | 8.2      | 0.2      | 0        | 7.6       | 0         | 0         |
| 29      | woman  | 6.8   | 2.1   | 1.7   | 8        | 2.4      | 0.9      | 7.6      | 2.5      | 1.8      | 8.5       | 2.5       | 1.4       |
| 30      | man    | 8.7   | 5.2   | 1     | 6.3      | 4.3      | 1        | 6.4      | 4.5      | 0.8      | 5.2       | 5.6       | 0.8       |
| Average |        | 6.7   | 4.6   | 0.3   | 7.3      | 4.9      | 0.3      | 6.7      | 5.0      | 0.3      | 6.6       | 5.1       | 0.3       |
| SD      |        | 2.1   | 3.0   | 0.5   | 2.2      | 3.1      | 0.6      | 2.4      | 3.3      | 0.6      | 2.1       | 2.9       | 0.5       |

## (i) Roughness

| ID      | gender | S <sup>T</sup> | F <sup>T</sup> | A <sup>T</sup> | S <sup>TV</sup> | F <sup>TV</sup> | A <sup>TV</sup> | S <sup>TA</sup> | F <sup>TA</sup> | A <sup>TA</sup> | S <sup>TVA</sup> | F <sup>TVA</sup> | A <sup>TVA</sup> |
|---------|--------|----------------|----------------|----------------|-----------------|-----------------|-----------------|-----------------|-----------------|-----------------|------------------|------------------|------------------|
| 1       | woman  | 0.3            | 0.2            | 9.9            | 0               | 9               | 9.7             | 0.4             | 0.7             | 9.8             | 0.2              | 9.8              | 9.9              |
| 2       | man    | 0.7            | 1              | 10             | 0               | 0               | 10              | 0               | 0               | 10              | 0                | 0                | 10               |
| 3       | man    | 0.4            | 0.1            | 10             | 0.4             | 0               | 10              | 1.6             | 0.8             | 10              | 0                | 0.1              | 8.3              |
| 4       | man    | 0              | 2.5            | 10             | 0               | 3.1             | 10              | 0               | 2.6             | 10              | 0                | 6.8              | 10               |
| 5       | man    | 3.5            | 0              | 10             | 0               | 0               | 10              | 0               | 0               | 10              | 3.6              | 0                | 9.8              |
| 6       | woman  | 0              | 0.1            | 10             | 0.1             | 0               | 10              | 0               | 0.1             | 9.1             | 0                | 0                | 10               |
| 7       | man    | 0              | 0              | 10             | 0               | 0               | 10              | 0               | 0               | 10              | 0                | 0                | 10               |
| 8       | man    | 0              | 0              | 10             | 2.4             | 2.7             | 10              | 0               | 0.1             | 10              | 0                | 0.1              | 10               |
| 9       | woman  | 1.1            | 0              | 10             | 0               | 0               | 10              | 3.1             | 1.2             | 6.7             | 0                | 0.1              | 10               |
| 10      | man    | 0.2            | 0.8            | 10             | 0.1             | 0.2             | 10              | 1.2             | 0.3             | 10              | 0                | 0.1              | 10               |
| 11      | man    | 0.2            | 0              | 9.9            | 0               | 0               | 10              | 0               | 1               | 10              | 0.1              | 7                | 10               |
| 12      | woman  | 2              | 1.5            | 9.6            | 2.8             | 2               | 8.6             | 0.6             | 3.1             | 7.7             | 0.5              | 2.3              | 7.3              |
| 13      | woman  | 0              | 0              | 10             | 0               | 0               | 10              | 0               | 0               | 10              | 1.8              | 0.2              | 10               |
| 14      | man    | 2.3            | 3.2            | 8.5            | 0.8             | 2.6             | 6.6             | 3.2             | 2.5             | 8.4             | 1                | 1.8              | 4.4              |
| 15      | man    | 5.1            | 2.3            | 10             | 1.1             | 0.3             | 9.7             | 0.3             | 0.2             | 9.5             | 6.7              | 0.2              | 9.8              |
| 16      | woman  | 0              | 0              | 10             | 3               | 0               | 8.5             | 0.7             | 1.9             | 10              | 7.2              | 2                | 10               |
| 17      | man    | 0              | 0              | 10             | 0               | 0               | 10              | 0               | 0.1             | 10              | 0.8              | 0                | 10               |
| 18      | man    | 0.6            | 0.6            | 9.5            | 0.5             | 0.5             | 9.6             | 0.5             | 0.2             | 9.7             | 0.3              | 0.2              | 9.6              |
| 19      | woman  | 0.4            | 1.1            | 10             | 2.5             | 2.2             | 9.7             | 0.5             | 0.5             | 9.5             | 0.4              | 0.6              | 9.7              |
| 20      | woman  | 5.9            | 7.2            | 10             | 1.6             | 2.1             | 10              | 2               | 5.9             | 10              | 2.2              | 5.3              | 10               |
| 21      | woman  | 0.1            | 0              | 10             | 0               | 0.2             | 10              | 0               | 0               | 10              | 0.1              | 0.2              | 10               |
| 22      | woman  | 1.3            | 0.5            | 10             | 1.9             | 1.5             | 9.9             | 1.3             | 0.7             | 9.5             | 2.4              | 3.3              | 9.4              |
| 23      | woman  | 0              | 0              | 10             | 0               | 0               | 10              | 0               | 0.2             | 10              | 0                | 0                | 10               |
| 24      | man    | 0.7            | 0              | 10             | 1.1             | 0.3             | 10              | 0.7             | 0.4             | 9.8             | 2.3              | 0.8              | 10               |
| 25      | woman  | 0              | 0              | 10             | 0               | 0               | 10              | 0               | 0               | 10              | 0                | 0                | 10               |
| 26      | woman  | 0              | 0              | 10             | 0               | 0               | 10              | 0               | 2               | 10              | 0                | 0                | 10               |
| 27      | man    | 0              | 0              | 10             | 0               | 0               | 10              | 0               | 0               | 10              | 0                | 0                | 9.8              |
| 28      | woman  | 0              | 0              | 10             | 0               | 0               | 10              | 0.2             | 0               | 10              | 0                | 0                | 9.8              |
| 29      | woman  | 1.4            | 4              | 9.4            | 2.1             | 6.5             | 8.8             | 2.5             | 5.1             | 9.5             | 0.5              | 1                | 9                |
| 30      | man    | 1.3            | 1.1            | 8.9            | 1.3             | 2.7             | 9.2             | 0.7             | 1               | 9.2             | 1.2              | 1                | 9.1              |
| Average |        | 0.9            | 0.9            | 9.9            | 0.7             | 1.2             | 9.7             | 0.7             | 1.0             | 9.6             | 1.0              | 1.4              | 9.5              |
| SD      |        | 1.5            | 1.6            | 0.4            | 1.0             | 2.1             | 0.7             | 0.9             | 1.5             | 0.8             | 1.9              | 2.5              | 1.1              |

## (j) Slipperiness

| ID      | gender | S <sup>T</sup> | F <sup>T</sup> | A <sup>T</sup> | S <sup>TV</sup> | F <sup>TV</sup> | A <sup>TV</sup> | S <sup>TA</sup> | F <sup>TA</sup> | A <sup>TA</sup> | S <sup>TVA</sup> | F <sup>TVA</sup> | A <sup>TVA</sup> |
|---------|--------|----------------|----------------|----------------|-----------------|-----------------|-----------------|-----------------|-----------------|-----------------|------------------|------------------|------------------|
| 1       | woman  | 0.1            | 0.1            | 0.3            | 0               | 0.1             | 0               | 0.2             | 2.2             | 0.3             | 0                | 0.2              | 0.2              |
| 2       | man    | 2.3            | 1.5            | 0              | 1.6             | 1               | 0               | 2.7             | 1.6             | 0               | 3.2              | 2.2              | 0                |
| 3       | man    | 3.5            | 7.7            | 0              | 6.1             | 1.7             | 0               | 5.9             | 5.2             | 0               | 1.8              | 5.2              | 0.7              |
| 4       | man    | 5.7            | 5.8            | 1              | 5.7             | 2.8             | 0               | 6.8             | 3               | 0               | 7.9              | 2                | 0.8              |
| 5       | man    | 2.7            | 0              | 0              | 1.4             | 0               | 0               | 0               | 0.2             | 0               | 1.8              | 2                | 0.1              |
| 6       | woman  | 2.5            | 3.8            | 0.4            | 7.8             | 4.9             | 0.1             | 6.4             | 6.9             | 0.1             | 8.2              | 4.6              | 0                |
| 7       | man    | 1.6            | 8.7            | 0              | 2.3             | 9               | 0               | 4               | 6.2             | 0               | 2.9              | 8.6              | 0                |
| 8       | man    | 4.5            | 2.3            | 1              | 3.6             | 4               | 0.1             | 3.9             | 0.1             | 0               | 5.1              | 3.7              | 0.1              |
| 9       | woman  | 0              | 0              | 0              | 0.2             | 0.2             | 0               | 3.3             | 0               | 0               | 1.8              | 0                | 0                |
| 10      | man    | 4              | 2.9            | 0              | 2.1             | 5               | 0.1             | 0.3             | 3.9             | 0               | 1.3              | 5                | 0.2              |
| 11      | man    | 5.5            | 0              | 0              | 8.1             | 1               | 0.1             | 4               | 0.1             | 0               | 0                | 0                | 0                |
| 12      | woman  | 2.7            | 3.1            | 0.9            | 3.9             | 2.2             | 0.5             | 3.5             | 3               | 1.4             | 5.4              | 1.6              | 0.7              |
| 13      | woman  | 0.3            | 0              | 0              | 0               | 0.2             | 0               | 0               | 0               | 0               | 0                | 3                | 0                |
| 14      | man    | 2.5            | 5.5            | 0.7            | 3.4             | 3.4             | 1.7             | 3.2             | 2.4             | 1.9             | 1.8              | 1.7              | 1.4              |
| 15      | man    | 2              | 5.1            | 0              | 5.5             | 7.8             | 0.3             | 2.2             | 5.1             | 0.3             | 1.3              | 6                | 0                |
| 16      | woman  | 9              | 2.8            | 0              | 7.7             | 3               | 0.3             | 6.7             | 2.3             | 1.4             | 2.9              | 3.1              | 1                |
| 17      | man    | 1.5            | 9.2            | 0              | 1.5             | 7.6             | 0               | 5.1             | 6               | 0               | 3.3              | 5                | 0                |
| 18      | man    | 1.6            | 6.9            | 0.5            | 2.8             | 6.9             | 0.7             | 3.5             | 8.2             | 0.3             | 1.1              | 8.5              | 0.2              |
| 19      | woman  | 3.5            | 3.3            | 0              | 0               | 0.8             | 0.8             | 7.6             | 2.5             | 0.5             | 6.6              | 2.5              | 0.4              |
| 20      | woman  | 1.1            | 4.7            | 0              | 2               | 2.7             | 0               | 1.9             | 1.2             | 0               | 2                | 5.4              | 0                |
| 21      | woman  | 1.5            | 5.7            | 0.1            | 2.5             | 2.1             | 0               | 2.4             | 3.2             | 0               | 2.4              | 2.8              | 0                |
| 22      | woman  | 4              | 1.8            | 0.1            | 4               | 1.9             | 0.2             | 5.5             | 2.7             | 1               | 3.4              | 3.1              | 0.8              |
| 23      | woman  | 1              | 0              | 0              | 6.7             | 0               | 0               | 5.9             | 2.2             | 0.1             | 5.6              | 0                | 0                |
| 24      | man    | 2              | 1              | 0.9            | 1.6             | 2.4             | 0.9             | 6               | 3.2             | 0.3             | 5.1              | 2.6              | 0.6              |
| 25      | woman  | 0.2            | 0              | 0              | 0               | 0               | 0               | 0               | 0               | 0.1             | 4.3              | 0                | 0                |
| 26      | woman  | 0              | 0              | 0              | 0.2             | 0               | 0               | 2.3             | 0               | 0               | 0                | 0                | 0                |
| 27      | man    | 1.8            | 6.6            | 1.1            | 2.9             | 5.1             | 0               | 1.6             | 7.8             | 0               | 2.5              | 5.5              | 1.5              |
| 28      | woman  | 0              | 0              | 0              | 0               | 0.2             | 0               | 0               | 0               | 0               | 0.3              | 0                | 0                |
| 29      | woman  | 6              | 1.9            | 1.5            | 5.7             | 0.5             | 2               | 6               | 1.8             | 1.6             | 3.8              | 2.8              | 1                |
| 30      | man    | 1.8            | 2.6            | 1              | 5.5             | 3.9             | 1.3             | 6.7             | 4.9             | 1.7             | 2.9              | 6.4              | 0.6              |
| Average |        | 2.5            | 3.1            | 0.3            | 3.2             | 2.7             | 0.3             | 3.6             | 2.9             | 0.4             | 3.0              | 3.1              | 0.3              |
| SD      |        | 2.1            | 2.9            | 0.5            | 2.6             | 2.6             | 0.5             | 2.4             | 2.5             | 0.6             | 2.3              | 2.5              | 0.5              |

## (k) Stickiness

| ID      | gender | S <sup>T</sup> | F <sup>T</sup> | A <sup>T</sup> | S <sup>TV</sup> | F <sup>TV</sup> | A <sup>TV</sup> | S <sup>TA</sup> | F <sup>TA</sup> | A <sup>TA</sup> | S <sup>TVA</sup> | F <sup>TVA</sup> | A <sup>TVA</sup> |
|---------|--------|----------------|----------------|----------------|-----------------|-----------------|-----------------|-----------------|-----------------|-----------------|------------------|------------------|------------------|
| 1       | woman  | 9.8            | 0.2            | 0.2            | 8.5             | 0.2             | 0               | 8.3             | 1.1             | 0.3             | 9.9              | 0.2              | 0.2              |
| 2       | man    | 4.5            | 3.4            | 7.4            | 6               | 0.9             | 7.2             | 6.3             | 0               | 9.4             | 7.9              | 0                | 6.3              |
| 3       | man    | 7.5            | 2.7            | 10             | 6               | 7.9             | 10              | 8.3             | 5.1             | 8.7             | 7.8              | 5.4              | 8.2              |
| 4       | man    | 6.1            | 1.9            | 1.1            | 7.7             | 7               | 1.7             | 7.4             | 6.3             | 6.8             | 7                | 6.2              | 1.3              |
| 5       | man    | 6.4            | 0              | 0              | 8               | 0               | 0               | 7.5             | 0               | 2.6             | 7.1              | 0                | 7.4              |
| 6       | woman  | 4.7            | 2.2            | 0.6            | 0.1             | 2.1             | 0               | 7.1             | 2.5             | 0               | 5.3              | 1.4              | 0                |
| 7       | man    | 1.2            | 0              | 2              | 0               | 0               | 5               | 0               | 1.2             | 2.8             | 2.9              | 1.8              | 6.2              |
| 8       | man    | 7.9            | 0              | 2.5            | 8.1             | 3.4             | 1.8             | 5.7             | 5.2             | 2.3             | 6.6              | 5                | 3.9              |
| 9       | woman  | 1.5            | 0.1            | 10             | 4.9             | 5.8             | 8.5             | 6.4             | 1.6             | 5.5             | 3.7              | 1.6              | 6.5              |
| 10      | man    | 3.7            | 2.2            | 4.9            | 5.4             | 1.5             | 7               | 5.5             | 0               | 2.3             | 4.8              | 3.3              | 4.8              |
| 11      | man    | 4.4            | 0              | 0.2            | 0               | 0               | 0               | 8.2             | 0               | 0.2             | 0                | 0                | 0                |
| 12      | woman  | 4.9            | 3.2            | 9.5            | 1.3             | 4.3             | 9.3             | 1.5             | 2.3             | 2.7             | 3.6              | 3.6              | 9.4              |
| 13      | woman  | 5.6            | 4.7            | 0              | 10              | 0               | 0               | 10              | 0.2             | 0               | 7.5              | 5                | 0.1              |
| 14      | man    | 2.7            | 0              | 0              | 5               | 4.4             | 1.6             | 3.6             | 3               | 1.8             | 5.9              | 4.1              | 7.9              |
| 15      | man    | 0.1            | 2.69           | 8              | 6.2             | 4.9             | 3               | 3.3             | 0.8             | 5               | 1.4              | 2.9              | 3.5              |
| 16      | woman  | 0              | 0              | 0              | 6.6             | 0.3             | 2.7             | 2.7             | 1.3             | 1.7             | 2.3              | 1.9              | 1.6              |
| 17      | man    | 8.8            | 0              | 9.1            | 7.6             | 0               | 9.1             | 6               | 0               | 1.5             | 9.4              | 0                | 8                |
| 18      | man    | 7.8            | 6.2            | 8.9            | 8.4             | 2               | 9.2             | 6.5             | 7.8             | 8.1             | 9.2              | 2.1              | 9.1              |
| 19      | woman  | 7.4            | 3.3            | 7.8            | 9.8             | 0.8             | 7.8             | 7.3             | 6.7             | 9.4             | 8.2              | 0.9              | 8                |
| 20      | woman  | 0              | 2.1            | 6.9            | 0               | 1.8             | 8.9             | 1.4             | 8.4             | 8.9             | 2.2              | 6.9              | 8.1              |
| 21      | woman  | 5.5            | 6.6            | 5.2            | 2.4             | 1.8             | 3.9             | 2.3             | 4.2             | 3.3             | 4                | 4.5              | 5.6              |
| 22      | woman  | 7.4            | 4.3            | 3              | 3.6             | 6.4             | 5.8             | 7.6             | 6.4             | 3.8             | 7.1              | 5.7              | 4.5              |
| 23      | woman  | 4.5            | 4              | 5.3            | 5.8             | 0.3             | 2.3             | 6.8             | 3               | 3.4             | 2.7              | 0.7              | 7.3              |
| 24      | man    | 7.4            | 2              | 5.6            | 8.3             | 2.2             | 0.9             | 6.3             | 7.5             | 1.4             | 9.1              | 7.1              | 0.8              |
| 25      | woman  | 10             | 0              | 4.8            | 10              | 0               | 0               | 10              | 0               | 0               | 10               | 0                | 0                |
| 26      | woman  | 8.1            | 7.8            | 9.8            | 10              | 8               | 8.1             | 8.2             | 0               | 10              | 8.6              | 7.5              | 10               |
| 27      | man    | 8.9            | 1.3            | 0              | 10              | 1               | 0               | 10              | 2.4             | 0               | 9.4              | 0.4              | 1.5              |
| 28      | woman  | 6.6            | 1.9            | 5.9            | 5.1             | 5.5             | 0               | 5.9             | 5.5             | 1.6             | 6.2              | 0.9              | 4.5              |
| 29      | woman  | 6.1            | 2              | 1.6            | 6.3             | 2.4             | 1.1             | 6.3             | 2.5             | 2.2             | 9.2              | 1.4              | 1.9              |
| 30      | man    | 2.7            | 1              | 1.3            | 4.2             | 7.6             | 1.4             | 5.7             | 2.3             | 1.6             | 6.2              | 1.2              | 0.8              |
| Average |        | 5.4            | 2.2            | 4.4            | 5.8             | 2.8             | 3.9             | 6.1             | 2.9             | 3.6             | 6.2              | 2.7              | 4.6              |
| SD      |        | 2.9            | 2.2            | 3.7            | 3.2             | 2.7             | 3.7             | 2.6             | 2.7             | 3.2             | 2.8              | 2.4              | 3.4              |

## (l) Dryness

| ID      | gender | S <sup>T</sup> | F <sup>T</sup> | A <sup>T</sup> | S <sup>TV</sup> | F <sup>TV</sup> | A <sup>TV</sup> | S <sup>TA</sup> | F <sup>TA</sup> | A <sup>TA</sup> | S <sup>TVA</sup> | F <sup>TVA</sup> | A <sup>TVA</sup> |
|---------|--------|----------------|----------------|----------------|-----------------|-----------------|-----------------|-----------------|-----------------|-----------------|------------------|------------------|------------------|
| 1       | woman  | 1              | 0.5            | 9.9            | 0               | 0.2             | 9.8             | 0.3             | 0.2             | 9.8             | 0.1              | 0.2              | 9.9              |
| 2       | man    | 1.6            | 5.5            | 7.6            | 4.2             | 10              | 9.9             | 6.3             | 8.2             | 10              | 1                | 2.5              | 9.9              |
| 3       | man    | 3.4            | 4.7            | 10             | 4.1             | 1.1             | 9.3             | 8.3             | 6.9             | 10              | 0.8              | 1.4              | 9.1              |
| 4       | man    | 2.1            | 1.7            | 10             | 1.2             | 8.9             | 10              | 1.7             | 8.7             | 10              | 0.6              | 0.7              | 10               |
| 5       | man    | 2.5            | 0              | 8.7            | 0               | 2.3             | 9               | 0               | 1.8             | 7.9             | 2                | 2                | 4.8              |
| 6       | woman  | 1.1            | 0              | 9.3            | 0.3             | 0.5             | 10              | 4.7             | 0.1             | 9.2             | 1.9              | 0                | 10               |
| 7       | man    | 6.4            | 8.2            | 10             | 5.1             | 7.8             | 10              | 5               | 8.6             | 8.4             | 3.5              | 8.4              | 10               |
| 8       | man    | 3.4            | 5.7            | 4.7            | 4.2             | 5.8             | 7.3             | 4.2             | 4.9             | 5.8             | 1.6              | 5.4              | 4.8              |
| 9       | woman  | 0              | 7.4            | 10             | 5               | 8.4             | 10              | 5.2             | 6.8             | 7.4             | 3.1              | 5                | 8.7              |
| 10      | man    | 0.1            | 4.8            | 10             | 2.4             | 3               | 8.9             | 8.6             | 7.6             | 8.5             | 0.2              | 4.3              | 8.9              |
| 11      | man    | 0              | 2              | 2.6            | 0               | 0               | 9.8             | 0               | 0               | 7               | 0                | 0.9              | 6.5              |
| 12      | woman  | 2.8            | 2.2            | 2.1            | 2.2             | 2.8             | 6.9             | 2.9             | 3               | 2.8             | 2                | 2.2              | 3.1              |
| 13      | woman  | 0              | 1.7            | 10             | 0               | 3.7             | 4.8             | 0               | 0               | 5.4             | 2.4              | 0                | 8                |
| 14      | man    | 4.9            | 6              | 8              | 2.1             | 2.9             | 6.2             | 0               | 7.4             | 6.3             | 2.2              | 2.7              | 2.8              |
| 15      | man    | 5.3            | 10             | 5.1            | 2.8             | 7.1             | 7.5             | 1.7             | 9               | 5.1             | 5.7              | 7.4              | 4.8              |
| 16      | woman  | 8.3            | 7.9            | 8.9            | 4.9             | 2.4             | 10              | 3               | 1               | 9.9             | 4.5              | 1.4              | 9.3              |
| 17      | man    | 0              | 0.5            | 0.6            | 0               | 8               | 0.6             | 3.5             | 8.5             | 8.6             | 2.5              | 1.3              | 10               |
| 18      | man    | 1.7            | 3.1            | 9.3            | 2               | 3               | 7.7             | 0               | 3.1             | 7.1             | 1.5              | 2                | 9                |
| 19      | woman  | 0.5            | 6.7            | 10             | 2.5             | 8.6             | 9.7             | 0.4             | 6.2             | 9.4             | 0.4              | 6.3              | 9.6              |
| 20      | woman  | 10             | 8.4            | 8              | 9.2             | 8               | 9.1             | 0.3             | 10              | 9.8             | 6.6              | 9.9              | 7.6              |
| 21      | woman  | 1.7            | 10             | 7              | 0               | 8.1             | 8.2             | 2.5             | 9.1             | 10              | 1.6              | 8.5              | 7.2              |
| 22      | woman  | 6.5            | 4.2            | 2.3            | 3.9             | 1.7             | 6.5             | 1.9             | 4.3             | 6.7             | 2.1              | 2.5              | 5.7              |
| 23      | woman  | 0.5            | 3.3            | 6.6            | 0.5             | 0               | 6.4             | 0.7             | 0.6             | 0.7             | 0                | 1.5              | 6.1              |
| 24      | man    | 1.8            | 2.9            | 7.2            | 1.8             | 1.4             | 9.5             | 1.4             | 8.8             | 7.8             | 2.5              | 2                | 8.3              |
| 25      | woman  | 0              | 0              | 10             | 0               | 0               | 10              | 0               | 0               | 10              | 0                | 0                | 10               |
| 26      | woman  | 0              | 2              | 8              | 0.1             | 0               | 5.8             | 0               | 0               | 5               | 0                | 0                | 8.2              |
| 27      | man    | 1.5            | 2.5            | 8.3            | 0               | 3.7             | 7.9             | 0.7             | 6.6             | 1.4             | 0.5              | 3.4              | 8.6              |
| 28      | woman  | 0              | 2.2            | 2.3            | 0.9             | 0.4             | 9.2             | 0.1             | 3.2             | 10              | 1.7              | 1.1              | 4.6              |
| 29      | woman  | 2.4            | 7.9            | 8.6            | 4.9             | 6.1             | 7.7             | 2.1             | 8               | 8.6             | 2.6              | 1.9              | 8.8              |
| 30      | man    | 2.7            | 7.4            | 9.1            | 2.9             | 7.3             | 9.1             | 2.1             | 6.2             | 9.4             | 1.9              | 5.8              | 9.3              |
| Average |        | 2.4            | 4.3            | 7.5            | 2.2             | 4.1             | 8.2             | 2.3             | 5.0             | 7.6             | 1.9              | 3.0              | 7.8              |
| SD      |        | 2.6            | 3.1            | 2.9            | 2.3             | 3.4             | 2.1             | 2.5             | 3.5             | 2.6             | 1.6              | 2.8              | 2.2              |

(m) Moistness

| ID      | gender | S <sup>T</sup> | F <sup>T</sup> | A <sup>T</sup> | S <sup>TV</sup> | F <sup>TV</sup> | A <sup>TV</sup> | S <sup>TA</sup> | F <sup>TA</sup> | A <sup>TA</sup> | S <sup>TVA</sup> | F <sup>TVA</sup> | A <sup>TVA</sup> |
|---------|--------|----------------|----------------|----------------|-----------------|-----------------|-----------------|-----------------|-----------------|-----------------|------------------|------------------|------------------|
| 1       | woman  | 8.6            | 9.9            | 0              | 7.3             | 9.4             | 0               | 9.7             | 7               | 0.1             | 9.8              | 9.8              | 0.2              |
| 2       | man    | 7              | 6              | 0              | 6.3             | 1.2             | 0               | 6.1             | 2.2             | 0               | 9                | 0                | 0                |
| 3       | man    | 6.3            | 4.7            | 0.5            | 5.9             | 5.1             | 9.3             | 6.1             | 3.8             | 0               | 6.2              | 4.7              | 5                |
| 4       | man    | 6.7            | 2.1            | 0              | 5.2             | 0               | 0               | 7.4             | 1.4             | 0               | 6                | 0                | 1.4              |
| 5       | man    | 7.7            | 1.8            | 1.5            | 7.3             | 7.7             | 1.1             | 8.5             | 0.8             | 0               | 4.9              | 7.9              | 0                |
| 6       | woman  | 6.7            | 1.1            | 0.3            | 4.7             | 5.1             | 0               | 7               | 4.9             | 0.1             | 5.1              | 5.6              | 0.7              |
| 7       | man    | 2.1            | 0              | 0              | 1.3             | 0               | 0               | 0               | 0               | 0               | 6.1              | 0                | 0                |
| 8       | man    | 6.2            | 4.9            | 5              | 3.5             | 2.6             | 2.1             | 5.8             | 4.9             | 2.7             | 6                | 4.4              | 1.2              |
| 9       | woman  | 1.5            | 0              | 0              | 5               | 5.6             | 0               | 3.5             | 0               | 0               | 2                | 6.1              | 0                |
| 10      | man    | 5.1            | 2.3            | 0              | 7.2             | 5.4             | 0.3             | 9.2             | 4.9             | 0               | 2.5              | 5.6              | 0                |
| 11      | man    | 5.2            | 0              | 1.2            | 0               | 1               | 0.1             | 10              | 0               | 0.2             | 1.4              | 1.9              | 0.2              |
| 12      | woman  | 8              | 7.3            | 7.2            | 6.7             | 8.2             | 6               | 2.6             | 7.5             | 7.6             | 7.8              | 7.1              | 5.8              |
| 13      | woman  | 4.9            | 5.4            | 0              | 4.1             | 0               | 0               | 10              | 5               | 0               | 7.5              | 5.3              | 0                |
| 14      | man    | 5.2            | 0              | 0.4            | 6.4             | 4.9             | 1.2             | 7.2             | 3.4             | 1.8             | 5.2              | 2.9              | 3                |
| 15      | man    | 0.3            | 0.1            | 0.6            | 6.1             | 0.3             | 2.3             | 7.2             | 0.4             | 1.5             | 0.3              | 0.3              | 5                |
| 16      | woman  | 0              | 1              | 0              | 0.9             | 2.9             | 0               | 0               | 7.1             | 1.1             | 7                | 7.3              | 8                |
| 17      | man    | 0.6            | 0              | 0              | 0               | 0               | 0               | 6               | 0               | 0               | 4.8              | 0                | 0.2              |
| 18      | man    | 7.2            | 1.7            | 0.6            | 5.6             | 7.5             | 2.2             | 6.5             | 7.1             | 0.6             | 6.6              | 1.6              | 1.2              |
| 19      | woman  | 9.7            | 1.3            | 0              | 6.9             | 0.7             | 0.3             | 8.2             | 2.7             | 0.6             | 8.2              | 1.8              | 0.4              |
| 20      | woman  | 1.8            | 1.4            | 2.5            | 1.6             | 3.5             | 1.2             | 2.2             | 0.6             | 0               | 3.1              | 1.3              | 0                |
| 21      | woman  | 4.6            | 0              | 1.8            | 8.4             | 3               | 3.2             | 4               | 1               | 0.2             | 8.4              | 3.8              | 1.1              |
| 22      | woman  | 6.1            | 5.7            | 2.9            | 5.9             | 6.7             | 4.2             | 7.5             | 7               | 2.4             | 7.1              | 7.6              | 2.3              |
| 23      | woman  | 1.5            | 0              | 0              | 4               | 0               | 0               | 4               | 0               | 0               | 2.9              | 0.8              | 0                |
| 24      | man    | 6.4            | 5.2            | 0.7            | 7               | 6.7             | 0.5             | 5.7             | 5.5             | 0.4             | 7.7              | 6.8              | 0.2              |
| 25      | woman  | 0.1            | 2              | 0              | 0               | 0               | 0.1             | 0               | 0               | 0               | 0.2              | 0                | 0                |
| 26      | woman  | 7.5            | 7.6            | 0              | 5.5             | 5.5             | 0               | 5.3             | 5               | 0               | 6.8              | 7.7              | 0                |
| 27      | man    | 9.2            | 2.4            | 0              | 8.2             | 0               | 0               | 9.6             | 0               | 0.8             | 8.6              | 0.4              | 0                |
| 28      | woman  | 6.9            | 0              | 0              | 4.7             | 0               | 0               | 5.9             | 0               | 0               | 6.8              | 0                | 0                |
| 29      | woman  | 6.7            | 1.7            | 1.2            | 2.2             | 1.5             | 0.7             | 3.7             | 1               | 2.1             | 3.8              | 1.4              | 1.5              |
| 30      | man    | 2              | 1.3            | 0.7            | 6.1             | 1.8             | 1               | 6.7             | 1.7             | 1.7             | 7                | 1.3              | 1.3              |
| Average |        | 5.1            | 2.6            | 0.9            | 4.8             | 3.2             | 1.2             | 5.9             | 2.8             | 0.8             | 5.6              | 3.4              | 1.3              |
| SD      |        | 2.9            | 2.7            | 1.6            | 2.5             | 3.0             | 2.1             | 2.9             | 2.7             | 1.5             | 2.6              | 3.1              | 2.1              |



**Table S2** Results of significance tests with multiple comparison analyses performed by Friedman's method with adjustment by Bonferroni's method.

(1) Attraction

|                            | Test statistic | Std. Error | Std.test statistic | Sig. | p value Adj. Sig. |
|----------------------------|----------------|------------|--------------------|------|-------------------|
| $\Delta^T-\Delta^{TV}$     | -.850          | .901       | -.913              | .361 | 1.000             |
| $\Delta^T-\Delta^{TA}$     | -1.250         | .901       | -1.343             | .179 | 1.000             |
| $\Delta^T-\Delta^{TVA}$    | -1.967         | .901       | -2.113             | .036 | 1.000             |
| $\Delta^T-S^T$             | 4.233          | .901       | 4.547              | .000 | .000              |
| $\Delta^T-F^T$             | 4.363          | .901       | 4.708              | .000 | .000              |
| $\Delta^T-F^{TA}$          | -5.000         | .901       | -5.371             | .000 | .000              |
| $\Delta^T-S^{TA}$          | -0.950         | .901       | -0.991             | .000 | .000              |
| $\Delta^T-F^{TV}$          | -6.117         | .901       | -6.570             | .000 | .000              |
| $\Delta^T-S^{TV}$          | -6.767         | .901       | -7.268             | .000 | .000              |
| $\Delta^T-F^{TVA}$         | -7.150         | .901       | -7.680             | .000 | .000              |
| $\Delta^T-S^{TVA}$         | -8.933         | .901       | -9.598             | .000 | .000              |
| $\Delta^{TV}-\Delta^{TA}$  | -.400          | .901       | -.430              | .667 | 1.000             |
| $\Delta^{TV}-\Delta^{TVA}$ | -1.117         | .901       | -1.189             | .230 | 1.000             |
| $\Delta^{TV}-S^T$          | 3.363          | .901       | 3.634              | .000 | .018              |
| $\Delta^{TV}-F^T$          | 3.533          | .901       | 3.795              | .000 | .019              |
| $\Delta^{TV}-F^{TA}$       | -4.150         | .901       | -4.438             | .000 | .001              |
| $\Delta^{TV}-S^{TA}$       | -5.100         | .901       | -5.478             | .000 | .000              |
| $\Delta^{TV}-F^{TV}$       | 5.267          | .901       | 5.657              | .000 | .000              |
| $\Delta^{TV}-S^{TV}$       | 5.917          | .901       | 6.356              | .000 | .000              |
| $\Delta^{TV}-F^{TVA}$      | -6.300         | .901       | -6.767             | .000 | .000              |
| $\Delta^{TV}-S^{TVA}$      | -8.083         | .901       | -8.683             | .000 | .000              |
| $\Delta^{TA}-\Delta^{TVA}$ | -.717          | .901       | -.770              | .441 | 1.000             |
| $\Delta^{TA}-S^T$          | 2.963          | .901       | 3.205              | .001 | .059              |
| $\Delta^{TA}-F^T$          | 3.133          | .901       | 3.366              | .001 | .050              |
| $\Delta^{TA}-F^{TA}$       | 3.750          | .901       | 4.026              | .000 | .004              |
| $\Delta^{TA}-S^{TA}$       | 4.700          | .901       | 5.049              | .000 | .000              |
| $\Delta^{TA}-F^{TV}$       | 4.867          | .901       | 5.226              | .000 | .000              |
| $\Delta^{TA}-S^{TV}$       | 5.517          | .901       | 5.926              | .000 | .000              |
| $\Delta^{TA}-F^{TVA}$      | -5.900         | .901       | -6.336             | .000 | .000              |
| $\Delta^{TA}-S^{TVA}$      | -7.663         | .901       | -8.253             | .000 | .000              |
| $\Delta^{TVA}-S^T$         | 2.267          | .901       | 2.435              | .016 | .983              |
| $\Delta^{TVA}-F^T$         | 2.417          | .901       | 2.596              | .009 | .623              |
| $\Delta^{TVA}-F^{TA}$      | 3.033          | .901       | 3.258              | .001 | .074              |
| $\Delta^{TVA}-S^{TA}$      | 3.083          | .901       | 4.279              | .000 | .001              |
| $\Delta^{TVA}-F^{TV}$      | 4.150          | .901       | 4.458              | .000 | .003              |
| $\Delta^{TVA}-S^{TV}$      | 4.600          | .901       | 5.156              | .000 | .000              |
| $\Delta^{TVA}-F^{TVA}$     | 5.183          | .901       | 5.586              | .000 | .000              |
| $\Delta^{TVA}-S^{TVA}$     | 6.967          | .901       | 7.483              | .000 | .000              |
| $S^T-F^T$                  | -.150          | .901       | -.161              | .872 | 1.000             |
| $S^T-F^{TA}$               | -.767          | .901       | -.824              | .410 | 1.000             |
| $S^T-S^{TA}$               | -1.717         | .901       | -1.844             | .065 | 1.000             |
| $S^T-F^{TV}$               | -1.883         | .901       | -2.023             | .043 | 1.000             |
| $S^T-S^{TV}$               | -2.533         | .901       | -2.721             | .007 | .429              |
| $S^T-F^{TVA}$              | -2.917         | .901       | -3.133             | .002 | .114              |
| $S^T-S^{TVA}$              | -4.700         | .901       | -5.049             | .000 | .000              |
| $F^T-F^{TA}$               | -.617          | .901       | -.662              | .508 | 1.000             |
| $F^T-S^{TA}$               | -1.567         | .901       | -1.683             | .092 | 1.000             |
| $F^T-F^{TV}$               | -1.733         | .901       | -1.862             | .063 | 1.000             |
| $F^T-S^{TV}$               | -2.383         | .901       | -2.560             | .010 | .691              |
| $F^T-F^{TVA}$              | -2.767         | .901       | -2.972             | .003 | .195              |
| $F^T-S^{TVA}$              | -4.550         | .901       | -4.887             | .000 | .000              |
| $F^{TA}-S^{TA}$            | .950           | .901       | 1.029              | .308 | 1.000             |
| $F^{TA}-F^{TV}$            | 1.117          | .901       | 1.189              | .230 | 1.000             |
| $F^{TA}-S^{TV}$            | 1.767          | .901       | 1.898              | .066 | 1.000             |
| $F^{TA}-F^{TVA}$           | -2.150         | .901       | -2.309             | .021 | 1.000             |
| $F^{TA}-S^{TVA}$           | -3.933         | .901       | -4.225             | .000 | .003              |
| $S^{TA}-F^{TV}$            | .167           | .901       | .179               | .856 | 1.000             |
| $S^{TA}-S^{TV}$            | .817           | .901       | .877               | .380 | 1.000             |
| $S^{TA}-F^{TVA}$           | -1.200         | .901       | -1.289             | .197 | 1.000             |
| $S^{TA}-S^{TVA}$           | -2.883         | .901       | -3.205             | .001 | .069              |
| $F^{TV}-S^{TV}$            | .850           | .901       | .896               | .485 | 1.000             |
| $F^{TV}-F^{TVA}$           | -1.033         | .901       | -1.110             | .267 | 1.000             |
| $F^{TV}-S^{TVA}$           | -2.817         | .901       | -3.026             | .002 | .164              |
| $S^{TV}-F^{TVA}$           | -.383          | .901       | -.412              | .681 | 1.000             |
| $S^{TV}-S^{TVA}$           | -2.167         | .901       | -2.327             | .020 | 1.000             |
| $F^{TVA}-S^{TVA}$          | 1.783          | .901       | 1.816              | .066 | 1.000             |

(2) Humanity

|                                      | Test statistic | Std. Error | Std.test statistic | Sig. | p value Adj. Sig. |
|--------------------------------------|----------------|------------|--------------------|------|-------------------|
| $\Delta^T-\Delta^{TV}$               | -1.017         | .931       | -1.062             | .275 | 1.000             |
| $\Delta^T-\Delta^{TA}$               | -1.067         | .931       | -1.146             | .262 | 1.000             |
| $\Delta^T-\underline{F}^T$           | 1.517          | .931       | 1.626              | .103 | 1.000             |
| $\Delta^T-\Delta^{TVA}$              | -1.900         | .931       | -2.041             | .041 | 1.000             |
| $\Delta^T-\underline{F}^{TA}$        | -3.733         | .931       | -4.010             | .000 | .004              |
| $\Delta^T-\underline{S}^T$           | 4.833          | .931       | 5.192              | .000 | .000              |
| $\Delta^T-\underline{F}^{TV}$        | -5.033         | .931       | -5.407             | .000 | .000              |
| $\Delta^T-\underline{S}^{TA}$        | -6.100         | .931       | -6.562             | .000 | .000              |
| $\Delta^T-\underline{F}^{TVA}$       | -6.417         | .931       | -6.893             | .000 | .000              |
| $\Delta^T-\underline{S}^{TV}$        | -7.167         | .931       | -7.688             | .000 | .000              |
| $\Delta^T-\underline{S}^{TVA}$       | -8.417         | .931       | -9.041             | .000 | .000              |
| $\Delta^{TV}-\Delta^{TA}$            | -.050          | .931       | -.054              | .957 | 1.000             |
| $\Delta^{TV}-\underline{F}^T$        | .000           | .931       | .337               | .581 | 1.000             |
| $\Delta^{TV}-\Delta^{TVA}$           | -.883          | .931       | -.949              | .343 | 1.000             |
| $\Delta^{TV}-\underline{F}^{TA}$     | -2.717         | .931       | -2.918             | .004 | .232              |
| $\Delta^{TV}-\underline{S}^T$        | 3.817          | .931       | 4.100              | .000 | .003              |
| $\Delta^{TV}-\underline{F}^{TV}$     | 4.017          | .931       | 4.315              | .000 | .001              |
| $\Delta^{TV}-\underline{S}^{TA}$     | -5.083         | .931       | -5.480             | .000 | .000              |
| $\Delta^{TV}-\underline{F}^{TVA}$    | -5.400         | .931       | -5.801             | .000 | .000              |
| $\Delta^{TV}-\underline{S}^{TV}$     | 6.150          | .931       | 6.608              | .000 | .000              |
| $\Delta^{TV}-\underline{S}^{TVA}$    | -7.400         | .931       | -7.948             | .000 | .000              |
| $\Delta^{TA}-\underline{F}^T$        | .450           | .931       | .483               | .629 | 1.000             |
| $\Delta^{TA}-\Delta^{TVA}$           | -.833          | .931       | -.895              | .371 | 1.000             |
| $\Delta^{TA}-\underline{F}^{TA}$     | 2.667          | .931       | 2.864              | .004 | .276              |
| $\Delta^{TA}-\underline{S}^T$        | 3.767          | .931       | 4.048              | .000 | .003              |
| $\Delta^{TA}-\underline{F}^{TV}$     | 3.967          | .931       | 4.261              | .000 | .001              |
| $\Delta^{TA}-\underline{S}^{TA}$     | 5.033          | .931       | 5.407              | .000 | .000              |
| $\Delta^{TA}-\underline{F}^{TVA}$    | -5.350         | .931       | -5.747             | .000 | .000              |
| $\Delta^{TA}-\underline{S}^{TV}$     | 6.100          | .931       | 6.562              | .000 | .000              |
| $\Delta^{TA}-\underline{S}^{TVA}$    | -7.350         | .931       | -7.895             | .000 | .000              |
| $\underline{F}^T-\Delta^{TVA}$       | -.583          | .931       | -.412              | .681 | 1.000             |
| $\underline{F}^T-\underline{F}^{TA}$ | -2.217         | .931       | -2.361             | .017 | 1.000             |
| $\underline{F}^T-\underline{S}^T$    | 3.917          | .931       | 3.583              | .000 | .024              |

|                                           | Test statistic | Std. Error | Std.test statistic | Sig. | p value Adj. Sig. |
|-------------------------------------------|----------------|------------|--------------------|------|-------------------|
| $\underline{F}^T-\underline{F}^{TV}$      | -3.817         | .931       | -3.778             | .000 | .010              |
| $\underline{F}^T-\underline{S}^{TA}$      | -4.583         | .931       | -4.923             | .000 | .000              |
| $\underline{F}^T-\underline{F}^{TVA}$     | -4.900         | .931       | -5.283             | .000 | .000              |
| $\underline{F}^T-\underline{S}^{TV}$      | -5.650         | .931       | -6.069             | .000 | .000              |
| $\underline{F}^T-\underline{S}^{TVA}$     | -6.900         | .931       | -7.412             | .000 | .000              |
| $\Delta^{TVA}-\underline{F}^{TA}$         | 1.833          | .931       | 1.969              | .049 | 1.000             |
| $\Delta^{TVA}-\underline{S}^T$            | 2.933          | .931       | 3.151              | .002 | .107              |
| $\Delta^{TVA}-\underline{F}^{TV}$         | 3.133          | .931       | 3.368              | .001 | .050              |
| $\Delta^{TVA}-\underline{S}^{TA}$         | 4.200          | .931       | 4.512              | .000 | .000              |
| $\Delta^{TVA}-\underline{F}^{TVA}$        | 4.517          | .931       | 4.852              | .000 | .000              |
| $\Delta^{TVA}-\underline{S}^{TV}$         | 5.267          | .931       | 5.657              | .000 | .000              |
| $\Delta^{TVA}-\underline{S}^{TVA}$        | 6.517          | .931       | 7.000              | .000 | .000              |
| $\underline{F}^{TA}-\underline{S}^T$      | 1.100          | .931       | 1.182              | .237 | 1.000             |
| $\underline{F}^{TA}-\underline{F}^{TV}$   | 1.300          | .931       | 1.395              | .163 | 1.000             |
| $\underline{F}^{TA}-\underline{S}^{TA}$   | 2.367          | .931       | 2.542              | .011 | .727              |
| $\underline{F}^{TA}-\underline{F}^{TVA}$  | -2.083         | .931       | -2.882             | .004 | .261              |
| $\underline{F}^{TA}-\underline{S}^{TV}$   | 3.433          | .931       | 3.688              | .000 | .015              |
| $\underline{F}^{TA}-\underline{S}^{TVA}$  | -4.683         | .931       | -5.091             | .000 | .000              |
| $\underline{S}^T-\underline{F}^{TV}$      | -.200          | .931       | -.215              | .830 | 1.000             |
| $\underline{S}^T-\underline{S}^{TA}$      | -1.267         | .931       | -1.361             | .174 | 1.000             |
| $\underline{S}^T-\underline{F}^{TVA}$     | -1.583         | .931       | -1.701             | .089 | 1.000             |
| $\underline{S}^T-\underline{S}^{TV}$      | -2.333         | .931       | -2.506             | .012 | .806              |
| $\underline{S}^T-\underline{S}^{TVA}$     | -3.583         | .931       | -3.849             | .000 | .006              |
| $\underline{F}^{TV}-\underline{S}^{TA}$   | -1.067         | .931       | -1.146             | .262 | 1.000             |
| $\underline{F}^{TV}-\underline{F}^{TVA}$  | -1.383         | .931       | -1.488             | .137 | 1.000             |
| $\underline{F}^{TV}-\underline{S}^{TV}$   | 2.133          | .931       | 2.292              | .022 | 1.000             |
| $\underline{F}^{TV}-\underline{S}^{TVA}$  | -3.383         | .931       | -3.634             | .000 | .018              |
| $\underline{S}^{TA}-\underline{F}^{TVA}$  | -.317          | .931       | -.340              | .734 | 1.000             |
| $\underline{S}^{TA}-\underline{S}^{TV}$   | 1.067          | .931       | 1.146              | .262 | 1.000             |
| $\underline{S}^{TA}-\underline{S}^{TVA}$  | -2.317         | .931       | -2.488             | .013 | .947              |
| $\underline{F}^{TVA}-\underline{S}^{TV}$  | .750           | .931       | .808               | .420 | 1.000             |
| $\underline{F}^{TVA}-\underline{S}^{TVA}$ | 2.000          | .931       | 2.148              | .032 | 1.000             |
| $\underline{S}^{TV}-\underline{S}^{TVA}$  | -1.250         | .931       | -1.343             | .179 | 1.000             |

(3) Slight warmth

|                            | Test statistic | Std. Error | Std.test statistic | Sig. | p value Adj. Sig. |                        | Test statistic | Std. Error | Std.test statistic | Sig. | p value Adj. Sig. |
|----------------------------|----------------|------------|--------------------|------|-------------------|------------------------|----------------|------------|--------------------|------|-------------------|
| $\Delta^T-\Delta^{TA}$     | -.067          | .931       | -1.038             | .299 | 1.000             | $\Delta^{TVA}-S^{TV}$  | 3.883          | .931       | 3.957              | .000 | .003              |
| $\Delta^T-\Delta^{TV}$     | -1.187         | .931       | -1.263             | .210 | 1.000             | $\Delta^{TVA}-F^{TA}$  | 4.817          | .931       | 5.174              | .000 | .000              |
| $\Delta^T-\Delta^{TVA}$    | -2.035         | .931       | -2.184             | .029 | 1.000             | $\Delta^{TVA}-S^{TVA}$ | 5.233          | .931       | 5.622              | .000 | .000              |
| $\Delta^T-S^T$             | 4.117          | .931       | 4.422              | .000 | .001              | $\Delta^{TVA}-F^{TVA}$ | 5.783          | .931       | 6.212              | .000 | .000              |
| $\Delta^T-F^T$             | 4.690          | .931       | 4.887              | .000 | .000              | $\Delta^{TVA}-F^{TV}$  | 6.883          | .931       | 6.320              | .000 | .000              |
| $\Delta^T-S^{TA}$          | -5.000         | .931       | -5.371             | .000 | .000              | $S^T-F^T$              | -.433          | .931       | -.485              | .642 | 1.000             |
| $\Delta^T-S^{TV}$          | -5.717         | .931       | -6.141             | .000 | .000              | $S^T-S^{TA}$           | -.583          | .931       | -.949              | .343 | 1.000             |
| $\Delta^T-F^{TA}$          | -5.850         | .931       | -7.358             | .000 | .000              | $S^T-S^{TV}$           | -1.000         | .931       | -1.719             | .088 | 1.000             |
| $\Delta^T-S^{TVA}$         | -7.267         | .931       | -7.808             | .000 | .000              | $S^T-F^{TA}$           | -2.733         | .931       | -2.936             | .003 | .219              |
| $\Delta^T-F^{TVA}$         | -7.817         | .931       | -8.398             | .000 | .000              | $S^T-S^{TVA}$          | -3.190         | .931       | -3.364             | .001 | .047              |
| $\Delta^T-F^{TV}$          | -7.917         | .931       | -8.504             | .000 | .000              | $S^T-F^{TVA}$          | -3.700         | .931       | -3.974             | .000 | .005              |
| $\Delta^{TA}-\Delta^{TV}$  | .200           | .931       | .215               | .830 | 1.000             | $S^T-F^{TV}$           | -3.800         | .931       | -4.082             | .000 | .003              |
| $\Delta^{TA}-\Delta^{TVA}$ | -1.067         | .931       | -1.146             | .252 | 1.000             | $F^T-S^{TA}$           | -.450          | .931       | -.483              | .629 | 1.000             |
| $\Delta^{TA}-S^T$          | 3.180          | .931       | 3.384              | .001 | .047              | $F^T-S^{TV}$           | -1.187         | .931       | -1.253             | .210 | 1.000             |
| $\Delta^{TA}-F^T$          | 3.583          | .931       | 3.649              | .000 | .008              | $F^T-F^{TA}$           | -2.300         | .931       | -2.471             | .013 | .880              |
| $\Delta^{TA}-S^{TA}$       | 4.035          | .931       | 4.332              | .000 | .001              | $F^T-S^{TVA}$          | -2.717         | .931       | -2.818             | .004 | .232              |
| $\Delta^{TA}-S^{TV}$       | 4.750          | .931       | 5.102              | .000 | .000              | $F^T-F^{TVA}$          | -3.267         | .931       | -3.506             | .000 | .000              |
| $\Delta^{TA}-F^{TA}$       | 5.883          | .931       | 6.320              | .000 | .000              | $F^T-F^{TV}$           | -3.367         | .931       | -3.616             | .000 | .000              |
| $\Delta^{TA}-S^{TVA}$      | -5.300         | .931       | -5.767             | .000 | .000              | $S^{TA}-S^{TV}$        | .717           | .931       | .770               | .441 | 1.000             |
| $\Delta^{TA}-F^{TVA}$      | -5.850         | .931       | -7.358             | .000 | .000              | $S^{TA}-F^{TA}$        | -1.850         | .931       | -1.987             | .047 | 1.000             |
| $\Delta^{TA}-F^{TV}$       | 6.850          | .931       | 7.465              | .000 | .000              | $S^{TA}-S^{TVA}$       | -2.267         | .931       | -2.435             | .015 | .983              |
| $\Delta^{TV}-\Delta^{TVA}$ | -.067          | .931       | -.631              | .532 | 1.000             | $S^{TA}-F^{TVA}$       | -2.817         | .931       | -3.026             | .002 | .164              |
| $\Delta^{TV}-S^T$          | 2.950          | .931       | 3.169              | .002 | .101              | $S^{TA}-F^{TV}$        | 2.917          | .931       | 3.133              | .002 | .114              |
| $\Delta^{TV}-F^T$          | 3.383          | .931       | 3.634              | .000 | .016              | $S^{TV}-F^{TA}$        | -1.133         | .931       | -1.217             | .223 | 1.000             |
| $\Delta^{TV}-S^{TA}$       | -3.833         | .931       | -4.118             | .000 | .003              | $S^{TV}-S^{TVA}$       | -1.550         | .931       | -1.685             | .096 | 1.000             |
| $\Delta^{TV}-S^{TV}$       | 4.550          | .931       | 4.587              | .000 | .000              | $S^{TV}-F^{TVA}$       | -2.100         | .931       | -2.256             | .024 | 1.000             |
| $\Delta^{TV}-F^{TA}$       | -5.883         | .931       | -6.105             | .000 | .000              | $S^{TV}-F^{TV}$        | -2.200         | .931       | -2.303             | .018 | 1.000             |
| $\Delta^{TV}-S^{TVA}$      | -6.100         | .931       | -6.552             | .000 | .000              | $F^{TA}-S^{TVA}$       | -.417          | .931       | -.448              | .654 | 1.000             |
| $\Delta^{TV}-F^{TVA}$      | -5.050         | .931       | -7.143             | .000 | .000              | $F^{TA}-F^{TVA}$       | -.967          | .931       | -1.036             | .298 | 1.000             |
| $\Delta^{TV}-F^{TV}$       | 6.750          | .931       | 7.251              | .000 | .000              | $F^{TA}-F^{TV}$        | 1.067          | .931       | 1.146              | .252 | 1.000             |
| $\Delta^{TVA}-S^T$         | 2.083          | .931       | 2.235              | .025 | 1.000             | $S^{TVA}-F^{TVA}$      | -.590          | .931       | -.591              | .565 | 1.000             |
| $\Delta^{TVA}-F^T$         | 2.517          | .931       | 2.703              | .007 | .453              | $S^{TVA}-F^{TV}$       | .850           | .931       | .886               | .485 | 1.000             |
| $\Delta^{TVA}-S^{TA}$      | 2.967          | .931       | 3.187              | .001 | .095              | $F^{TVA}-F^{TV}$       | .100           | .931       | .107               | .914 | 1.000             |

**Table S3** Spearman's rank correlation coefficient between attraction, humanity, slight warmth (*nukumori*), tactile factors, mechanical factors, and physical factors.

(a) T condition.

|                            |                                         | Attraction | Humidity | Slight warm<br>(indoor m1) | Warm  | Cold  | Soft  | Hard  | Smooth | Rough | Slippery | Sticky | Dry   | Moist | $R_{\text{max}}$ | $R_{\text{min}}$ | $\rho$ | So    | Ss    | Young's<br>modulus | $\mu_{\text{max}}$ | Thermal<br>conductivity | Surface<br>tension |
|----------------------------|-----------------------------------------|------------|----------|----------------------------|-------|-------|-------|-------|--------|-------|----------|--------|-------|-------|------------------|------------------|--------|-------|-------|--------------------|--------------------|-------------------------|--------------------|
| Attraction                 | Correlation coefficient                 | 1.000      | .640     | .796                       | .524  | -.249 | .560  | -.632 | .557   | .558  | .467     | -.054  | -.242 | .364  | .011             | .011             | .083   | 0.110 | 0.079 | .550               | .079               | .550                    | .514               |
|                            | Significant probability<br>(two-tailed) | 0.000      | 0.000    | 0.000                      | 0.000 | 0.000 | 0.000 | 0.000 | 0.000  | 0.000 | 0.010    | 0.020  | 0.000 | 0.018 | 0.000            | 0.000            | 0.437  | 0.302 | 0.734 | 0.734              | 0.000              | 0.734                   | 0.000              |
|                            | Frequency                               | 90         | 90       | 90                         | 90    | 90    | 90    | 90    | 90     | 90    | 90       | 90     | 90    | 90    | 90               | 90               | 90     | 90    | 90    | 90                 | 90                 | 90                      | 90                 |
| Humidity                   | Correlation coefficient                 | .640       | 1.000    | .628                       | -.249 | -.060 | -.326 | -.334 | .578   | .375  | .437     | .030   | -.435 | -.010 | .000             | .000             | .049   | 0.143 | .419  | .419               | .419               | .419                    | .419               |
|                            | Significant probability<br>(two-tailed) | 0.000      | 0.000    | 0.000                      | 0.014 | 0.541 | 0.015 | 0.002 | 0.000  | 0.001 | 0.000    | 0.052  | 0.040 | 0.000 | 0.929            | 0.944            | 0.004  | 0.004 | 0.000 | 0.114              | 0.000              | 0.114                   | 0.000              |
|                            | Frequency                               | 90         | 90       | 90                         | 90    | 90    | 90    | 90    | 90     | 90    | 90       | 90     | 90    | 90    | 90               | 90               | 90     | 90    | 90    | 90                 | 90                 | 90                      | 90                 |
| Slight warm<br>(indoor m1) | Correlation coefficient                 | .796       | .628     | 1.000                      | .624  | -.347 | .544  | -.621 | .568   | .533  | .477     | .070   | -.245 | .447  | -.020            | -.092            | .000   | 0.018 | 0.038 | .586               | -.038              | .586                    | .546               |
|                            | Significant probability<br>(two-tailed) | 0.000      | 0.000    | 0.000                      | 0.000 | 0.003 | 0.000 | 0.000 | 0.000  | 0.000 | 0.000    | 0.474  | 0.020 | 0.000 | 0.853            | 0.389            | 0.670  | 0.723 | 0.723 | 0.000              | 0.723              | 0.000                   |                    |
|                            | Frequency                               | 90         | 90       | 90                         | 90    | 90    | 90    | 90    | 90     | 90    | 90       | 90     | 90    | 90    | 90               | 90               | 90     | 90    | 90    | 90                 | 90                 | 90                      | 90                 |
| Warm                       | Correlation coefficient                 | .524       | -.249    | .624                       | 1.000 | -.499 | -.692 | -.696 | .397   | .403  | .324     | -.109  | .299  | .362  | -.013            | -.122            | -.014  | .378  | .378  | .757               | .378               | .757                    | .378               |
|                            | Significant probability<br>(two-tailed) | 0.000      | 0.014    | 0.000                      | 0.000 | 0.000 | 0.000 | 0.000 | 0.000  | 0.000 | 0.002    | 0.307  | 0.014 | 0.000 | 0.903            | 0.251            | 0.897  | 0.000 | 0.000 | 0.000              | 0.000              | 0.000                   |                    |
|                            | Frequency                               | 90         | 90       | 90                         | 90    | 90    | 90    | 90    | 90     | 90    | 90       | 90     | 90    | 90    | 90               | 90               | 90     | 90    | 90    | 90                 | 90                 | 90                      | 90                 |
| Cold                       | Correlation coefficient                 | -.249      | 0.065    | -.310                      | -.499 | 1.000 | -.517 | .505  | -.177  | .477  | -.010    | 0.016  | .303  | -.004 | -.020            | 0.009            | -.001  | -.378 | -.378 | .513               | .378               | .513                    | .378               |
|                            | Significant probability<br>(two-tailed) | 0.018      | 0.541    | 0.003                      | 0.000 | 0.000 | 0.000 | 0.000 | 0.096  | 0.000 | 0.928    | 0.881  | 0.000 | 0.968 | 0.788            | 0.517            | 0.994  | 0.000 | 0.000 | 0.000              | 0.000              | 0.000                   |                    |
|                            | Frequency                               | 90         | 90       | 90                         | 90    | 90    | 90    | 90    | 90     | 90    | 90       | 90     | 90    | 90    | 90               | 90               | 90     | 90    | 90    | 90                 | 90                 | 90                      | 90                 |
| Soft                       | Correlation coefficient                 | .560       | -.256    | .548                       | .689  | -.517 | 1.000 | -.901 | .563   | -.751 | .378     | -.147  | -.468 | .344  | .024             | -.008            | .087   | .261  | .261  | .817               | .261               | .817                    | .261               |
|                            | Significant probability<br>(two-tailed) | 0.000      | 0.015    | 0.000                      | 0.000 | 0.000 | 0.000 | 0.000 | 0.000  | 0.000 | 0.164    | 0.000  | 0.000 | 0.001 | 0.822            | 0.525            | 0.591  | 0.013 | 0.013 | 0.000              | 0.000              | 0.000                   |                    |
|                            | Frequency                               | 90         | 90       | 90                         | 90    | 90    | 90    | 90    | 90     | 90    | 90       | 90     | 90    | 90    | 90               | 90               | 90     | 90    | 90    | 90                 | 90                 | 90                      | 90                 |
| Hard                       | Correlation coefficient                 | -.632      | -.324    | -.621                      | -.696 | .505  | -.901 | 1.000 | -.564  | .784  | -.413    | .112   | .410  | -.338 | -.005            | 0.014            | -.050  | -.233 | -.233 | .808               | .233               | .808                    | .233               |
|                            | Significant probability<br>(two-tailed) | 0.000      | 0.002    | 0.000                      | 0.000 | 0.000 | 0.000 | 0.000 | 0.000  | 0.000 | 0.294    | 0.000  | 0.001 | 0.545 | 0.893            | 0.642            | 0.027  | 0.027 | 0.000 | 0.000              | 0.027              | 0.000                   |                    |
|                            | Frequency                               | 90         | 90       | 90                         | 90    | 90    | 90    | 90    | 90     | 90    | 90       | 90     | 90    | 90    | 90               | 90               | 90     | 90    | 90    | 90                 | 90                 | 90                      | 90                 |
| Smooth                     | Correlation coefficient                 | .557       | .578     | .588                       | .397  | -.177 | .563  | -.564 | 1.000  | -.631 | .617     | .032   | -.432 | .480  | .070             | .075             | .047   | .234  | .234  | .538               | .234               | .538                    | .762               |
|                            | Significant probability<br>(two-tailed) | 0.000      | 0.000    | 0.000                      | 0.000 | 0.096 | 0.000 | 0.000 | 0.000  | 0.000 | 0.000    | 0.768  | 0.000 | 0.000 | 0.511            | .481             | .061   | 0.034 | 0.034 | 0.000              | 0.000              | 0.000                   |                    |
|                            | Frequency                               | 90         | 90       | 90                         | 90    | 90    | 90    | 90    | 90     | 90    | 90       | 90     | 90    | 90    | 90               | 90               | 90     | 90    | 90    | 90                 | 90                 | 90                      | 90                 |
| Rough                      | Correlation coefficient                 | .558       | .357     | .533                       | -.601 | .477  | .751  | .784  | -.631  | 1.000 | -.346    | .064   | .584  | -.356 | -.136            | 0.008            | 0.160  | -.039 | -.039 | .742               | .039               | .742                    | .704               |
|                            | Significant probability<br>(two-tailed) | 0.000      | 0.001    | 0.000                      | 0.000 | 0.000 | 0.000 | 0.000 | 0.000  | 0.001 | 0.551    | 0.000  | 0.001 | 0.200 | 0.940            | 0.131            | 0.718  | 0.718 | 0.000 | 0.000              | 0.718              | 0.000                   |                    |
|                            | Frequency                               | 90         | 90       | 90                         | 90    | 90    | 90    | 90    | 90     | 90    | 90       | 90     | 90    | 90    | 90               | 90               | 90     | 90    | 90    | 90                 | 90                 | 90                      | 90                 |
| Slippery                   | Correlation coefficient                 | .467       | .433     | .477                       | .324  | -.109 | .378  | -.413 | .617   | .346  | 1.000    | -.122  | -.086 | .299  | .173             | .011             | .044   | .012  | -.012 | .479               | .012               | .479                    | .491               |
|                            | Significant probability<br>(two-tailed) | 0.000      | 0.000    | 0.000                      | 0.002 | 0.920 | 0.000 | 0.000 | 0.000  | 0.001 | 0.232    | .421   | 0.004 | 0.102 | .917             | 0.678            | 0.909  | 0.909 | 0.000 | 0.009              | 0.000              | 0.000                   |                    |
|                            | Frequency                               | 90         | 90       | 90                         | 90    | 90    | 90    | 90    | 90     | 90    | 90       | 90     | 90    | 90    | 90               | 90               | 90     | 90    | 90    | 90                 | 90                 | 90                      | 90                 |
| Sticky                     | Correlation coefficient                 | 0.054      | 0.206    | 0.076                      | -.109 | 0.016 | -.147 | 0.112 | 0.032  | 0.064 | -.122    | 1.000  | -.214 | .302  | .077             | .022             | 0.118  | .403  | .403  | .265               | .403               | .265                    |                    |
|                            | Significant probability<br>(two-tailed) | 0.610      | 0.052    | 0.474                      | 0.307 | 0.881 | 0.166 | 0.294 | 0.768  | 0.551 | 0.252    | 0.043  | 0.004 | 0.472 | 0.837            | 0.269            | 0.000  | 0.000 | 0.012 | 0.000              | 0.012              | 0.193                   |                    |
|                            | Frequency                               | 90         | 90       | 90                         | 90    | 90    | 90    | 90    | 90     | 90    | 90       | 90     | 90    | 90    | 90               | 90               | 90     | 90    | 90    | 90                 | 90                 | 90                      | 90                 |
| Dry                        | Correlation coefficient                 | -.242      | -.211    | -.245                      | -.259 | .393  | -.468 | .410  | -.432  | .584  | -.006    | -.214  | 1.000 | -.553 | -.195            | -.117            | .061   | .226  | .226  | .359               | .226               | .359                    | .586               |
|                            | Significant probability<br>(two-tailed) | 0.022      | 0.046    | 0.020                      | 0.014 | 0.000 | 0.000 | 0.000 | 0.000  | 0.000 | 0.421    | 0.043  | 0.000 | 0.066 | 0.272            | 0.570            | 0.032  | 0.032 | .001  | .032               | .001               | .000                    |                    |
|                            | Frequency                               | 90         | 90       | 90                         | 90    | 90    | 90    | 90    | 90     | 90    | 90       | 90     | 90    | 90    | 90               | 90               | 90     | 90    | 90    | 90                 | 90                 | 90                      | 90                 |
| Moist                      | Correlation coefficient                 | .364       | .435     | .447                       | .362  | -.004 | .344  | -.338 | .480   | .356  | .299     | .302   | -.553 | 1.000 | .040             | -.106            | .005   | .317  | .317  | .262               | .317               | .262                    |                    |
|                            | Significant probability<br>(two-tailed) | 0.000      | 0.000    | 0.000                      | 0.000 | 0.968 | 0.001 | 0.001 | 0.000  | 0.001 | 0.004    | 0.004  | 0.006 | 0.658 | 0.658            | 0.321            | 0.960  | 0.002 | 0.002 | 0.013              | 0.002              | 0.013                   | 0.000              |
|                            | Frequency                               | 90         | 90       | 90                         | 90    | 90    | 90    | 90    | 90     | 90    | 90       | 90     | 90    | 90    | 90               | 90               | 90     | 90    | 90    | 90                 | 90                 | 90                      | 90                 |
| $F_{\text{max}}$           | Correlation coefficient                 | 0.011      | -.010    | -.020                      | -.013 | -.028 | 0.024 | -.065 | .070   | -.136 | .173     | .077   | -.195 | .047  | 1.000            | .637             | -.172  | .144  | -.141 | .025               | .141               | -.105                   |                    |
|                            | Significant probability<br>(two-tailed) | 0.919      | 0.929    | 0.835                      | 0.903 | 0.780 | 0.822 | 0.545 | 0.311  | 0.200 | 0.102    | 0.472  | 0.066 | 0.658 | 0.000            | 0.106            | 0.184  | 0.184 | 0.825 | 0.184              | 0.325              | 0.019                   |                    |
|                            | Frequency                               | 90         | 90       | 90                         | 90    | 90    | 90    | 90    | 90     | 90    | 90       | 90     | 90    | 90    | 90               | 90               | 90     | 90    | 90    | 90                 | 90                 | 90                      | 90                 |
| $F_{\text{min}}$           | Correlation coefficient                 | -.083      | -.049    | -.092                      | -.122 | 0.065 | -.068 | .014  | -.075  | .008  | .011     | .022   | -.117 | -.106 | .637             | 1.000            | -.056  | -.040 | -.040 | .040               | .040               | -.040                   |                    |
|                            | Significant probability<br>(two-tailed) | 0.437      | 0.644    | 0.389                      | 0.251 | 0.517 | 0.525 | 0.893 | 0.481  | 0.900 | 0.917    | 0.813  | 0.272 | 0.321 | 0.000            | 0.596            | 0.707  | 0.707 | 1.000 | 0.707              | 1.000              | 0.707                   |                    |
|                            | Frequency                               | 90         | 90       | 90                         | 90    | 90    | 90    | 90    | 90     | 90    | 90       | 90     | 90    | 90    | 90               | 90               | 90     | 90    | 90    | 90                 | 90                 | 90                      | 90                 |
| So                         | Correlation coefficient                 | 0.110      | 0.183    | 0.000                      | -.014 | -.001 | 0.013 | -.010 | .017   | .007  | 0.118    | .018   | -.006 | 0.065 | -.173            | -.056            | 1.000  | .112  | .014  | .014               | .014               | .012                    |                    |
|                            | Significant probability<br>(two-tailed) | 0.302      | 0.084    | 0.676                      | 0.897 | 0.994 | 0.591 | 0.642 | 0.661  | 0.131 | 0.488    | 0.269  | 0.570 | .900  | 0.106            | 0.598            | 0.292  | 0.292 | 0.752 | 0.292              | 0.752              | .461                    |                    |
|                            | Frequency                               | 90         | 90       | 90                         | 90    | 90    | 90    | 90    | 90     | 90    | 90       | 90     | 90    | 90    | 90               | 90               | 90     | 90    | 90    | 90                 | 90                 | 90                      | 90                 |
| Ss                         | Correlation coefficient                 | 0.004      | .017     | 0.038                      | .278  | .386  | .261  | -.213 | -.224  | -.019 | .043     | .276   | .276  | -.117 | -.141            | -.040            | 1.000  | 1.000 | .500  | .500               | .500               | .500                    |                    |
|                            | Significant probability<br>(two-tailed) | 0.734      | 0.000    | 0.723                      | 0.000 | 0.000 | 0.013 | 0.027 | 0.034  | 0.718 | 0.909    | 0.000  | 0.032 | 0.002 | 0.184            | 0.707            | 0.292  | 0.292 | 0.000 | 0.000              | 0.000              | 0.000                   |                    |
|                            | Frequency                               | 90         | 90       | 90                         | 90    | 90    | 90    | 90    | 90     | 90    | 90       | 90     | 90    | 90    | 90               | 90               | 90     | 90    | 90    | 90                 | 90                 | 90                      | 90                 |
| Young's<br>modulus         | Correlation coefficient                 | 0.036      | .419     | 0.038                      | .378  | .378  | .261  | -.213 | -.224  | -.019 | .043     | .276   | .276  | -.117 | -.141            | -.040            | 1.000  | 1.000 | .500  | .500               | .500               | .500                    |                    |
|                            | Significant probability<br>(two-tailed) | 0.734      | 0.000    | 0.723                      | 0.000 | 0.000 | 0.013 | 0.027 | 0.034  | 0.718 | 0.909    | 0.000  | 0.032 | 0.002 | 0.184            | 0.707            | 0.292  | 0.292 | 0.000 | 0.000              | 0.000              | 0.000                   |                    |
|                            | Frequency                               | 90         | 90       | 90                         | 90    | 90    | 90    | 90    | 90     | 90    | 90       | 90     | 90    | 90    | 90               | 90               | 90     | 90    | 90    | 90                 | 90                 | 90                      | 90                 |
| $\mu_{\text{max}}$         | Correlation coefficient                 | -.550      | -.108    | -.586                      | -.757 | .513  | -.817 | .808  | -.538  | .742  | -.479    | .265   | .399  | -.262 | -.105            | 0.000            | 0.034  | -.500 | -.500 | 1.000              | .500               | .500                    |                    |
|                            | Significant probability<br>(two-tailed) | 0.000      | 0.114    | 0.000                      | 0.000 | 0.000 | 0.000 | 0.000 | 0.000  | 0.000 | 0.012    | 0.001  | 0.013 | 0.325 | 1.000            | 0.752            | 0.000  | 0.000 | 0.000 | 0.000              | 0.000              | 0.000                   |                    |
|                            | Frequency                               | 90         | 90       | 90                         | 90    | 90    | 90    | 90    | 90     | 90    | 90       | 90     | 90    | 90    | 90               | 90               | 90     | 90    | 90    | 90                 | 90                 | 90                      | 90                 |
| Thermal<br>conductivity    | Correlation coefficient                 | -.036      | .419     | -.038                      | -.378 | .378  | -.261 | .533  | .224   | .039  | 0.012    | .403   | -.226 | .317  | .141             | 0.040            | 0.112  | -.100 | -.100 | .500               | .500               | .500                    |                    |
|                            | Significant probability<br>(two-tailed) | 0.734      | 0.000    | 0.723                      | 0.000 | 0.000 | 0.013 | 0.027 | 0.034  | 0.718 | 0.909    | 0.000  | 0.032 | 0.002 | 0.184            | 0.707            | 0.292  | 0.292 | 0.000 | 0.000              | 0.000              | 0.000                   |                    |
|                            | Frequency                               | 90         | 90       | 90                         | 90    | 90    | 90    | 90    | 90     | 90    | 90       | 90     | 90    | 90    | 90               | 90               | 90     | 90    | 90    | 90                 | 90                 | 90                      | 90                 |
| Surface<br>tension         | Correlation coefficient                 | -.514      | -.887    | -.548                      | -.379 | 0.136 | -.556 | .575  | -.762  | .704  | -.491    | -.139  | .586  | -.579 | -.246            |                  |        |       |       |                    |                    |                         |                    |

(b) TV condition

|                         |                                         | Attraction | Humidity | Slight warm<br>(medium) | Cold   | Soft   | Hard   | Smooth | Rough  | Slippery | Sticky | Dry    | Moist  | $F_{1}^{+}$ | $F_{1}^{-}$ | $r$    | $S_{0}$ | $S_{1}$ | Young's<br>modulus | $\rho_{max}$ | Thermal<br>conductivity | Surface<br>tension |         |
|-------------------------|-----------------------------------------|------------|----------|-------------------------|--------|--------|--------|--------|--------|----------|--------|--------|--------|-------------|-------------|--------|---------|---------|--------------------|--------------|-------------------------|--------------------|---------|
| Attraction              | Correlation coefficient                 | 1.000      | .788*    | .794*                   | .576*  | -0.172 | .665*  | -.602* | .667*  | -.603*   | .417*  | 0.135  | -.452* | .434*       | 0.016       | 0.076  | 0.179   | -0.039  | -0.030             | -.603*       | 0.030                   | -.603*             | .633*   |
|                         | Significant probability<br>(two-tailed) |            | 0.000    | 0.000                   | 0.000  | 0.105  | 0.000  | 0.000  | 0.000  | 0.000    | 0.000  | 0.204  | 0.000  | 0.000       | 0.879       | 0.479  | 0.091   | 0.776   | 0.776              | 0.000        | 0.776                   | 0.000              |         |
|                         | Frequency                               | 90         | 90       | 90                      | 90     | 90     | 90     | 90     | 90     | 90       | 90     | 90     | 90     | 90          | 90          | 90     | 90      | 90      | 90                 | 90           | 90                      | 90                 | 90      |
| Humidity                | Correlation coefficient                 | .788*      | 1.000    | .669*                   | .440*  | -0.098 | .543*  | -.471* | .760*  | -.581*   | .551*  | .241*  | -.501* | .368*       | 0.119       | .217*  | .277*   | -.267*  | -.267*             | -.465*       | -.263*                  | -.465*             | -.728*  |
|                         | Significant probability<br>(two-tailed) | 0.000      |          | 0.000                   | 0.000  | 0.359  | 0.000  | 0.000  | 0.000  | 0.000    | 0.000  | 0.022  | 0.000  | 0.000       | 0.264       | 0.040  | 0.089   | 0.012   | 0.012              | 0.000        | 0.012                   | 0.000              |         |
|                         | Frequency                               | 90         | 90       | 90                      | 90     | 90     | 90     | 90     | 90     | 90       | 90     | 90     | 90     | 90          | 90          | 90     | 90      | 90      | 90                 | 90           | 90                      | 90                 | 90      |
| Slight warm<br>(medium) | Correlation coefficient                 | .794*      | .669*    | 1.000                   | .817*  | -.391* | -.682* | -.603* | .607*  | -.576*   | .510*  | 0.044  | -.361* | .431*       | 0.020       | 0.072  | 0.141   | .231*   | .231*              | -.711*       | -.231*                  | -.711*             | -.480*  |
|                         | Significant probability<br>(two-tailed) | 0.000      | 0.000    |                         | 0.000  | 0.000  | 0.000  | 0.000  | 0.000  | 0.000    | 0.000  | 0.682  | 0.000  | 0.000       | 0.851       | 0.499  | 0.185   | 0.028   | 0.028              | 0.000        | 0.028                   | 0.000              |         |
|                         | Frequency                               | 90         | 90       | 90                      | 90     | 90     | 90     | 90     | 90     | 90       | 90     | 90     | 90     | 90          | 90          | 90     | 90      | 90      | 90                 | 90           | 90                      | 90                 | 90      |
| Warm                    | Correlation coefficient                 | .576*      | .440*    | .817*                   | 1.000  | -.446* | .636*  | -.578* | .470*  | -.487*   | .395*  | -0.024 | -.284* | .398*       | -0.018      | 0.072  | -0.002  | .366*   | .366*              | -.736*       | -.366*                  | -.736*             | -.369*  |
|                         | Significant probability<br>(two-tailed) | 0.000      | 0.000    | 0.000                   |        | 0.000  | 0.000  | 0.000  | 0.000  | 0.000    | 0.000  | 0.819  | 0.005  | 0.000       | 0.869       | 0.499  | 0.986   | 0.000   | 0.000              | 0.000        | 0.000                   | 0.000              |         |
|                         | Frequency                               | 90         | 90       | 90                      | 90     | 90     | 90     | 90     | 90     | 90       | 90     | 90     | 90     | 90          | 90          | 90     | 90      | 90      | 90                 | 90           | 90                      | 90                 | 90      |
| Cold                    | Correlation coefficient                 | -0.172     | -0.098   | -.391*                  | -.446* | 1.000  | -.480* | .424*  | -0.093 | .421*    | 0.056  | 0.089  | 0.196  | 0.115       | -0.101      | -0.124 | -0.048  | -.355*  | -.355*             | .484*        | .355*                   | .484*              | 0.130   |
|                         | Significant probability<br>(two-tailed) | 0.105      | 0.359    | 0.000                   | 0.000  |        | 0.000  | 0.000  | 0.000  | 0.381    | 0.000  | 0.599  | 0.005  | 0.003       | 0.281       | 0.342  | 0.246   | 0.659   | 0.001              | 0.001        | 0.000                   | 0.001              |         |
|                         | Frequency                               | 90         | 90       | 90                      | 90     | 90     | 90     | 90     | 90     | 90       | 90     | 90     | 90     | 90          | 90          | 90     | 90      | 90      | 90                 | 90           | 90                      | 90                 | 90      |
| Soft                    | Correlation coefficient                 | .665*      | .543*    | .682*                   | .636*  | -.480* | 1.000  | -.830* | .600*  | -.814*   | .382*  | -0.016 | -.569* | .321*       | 0.064       | 0.195  | 0.083   | 0.157   | 0.157              | -.782*       | -.157                   | -.782*             | -.625*  |
|                         | Significant probability<br>(two-tailed) | 0.000      | 0.000    | 0.000                   | 0.000  | 0.000  |        | 0.000  | 0.000  | 0.000    | 0.000  | 0.880  | 0.000  | 0.002       | 0.547       | 0.066  | 0.439   | 0.140   | 0.140              | 0.000        | 0.140                   | 0.000              |         |
|                         | Frequency                               | 90         | 90       | 90                      | 90     | 90     | 90     | 90     | 90     | 90       | 90     | 90     | 90     | 90          | 90          | 90     | 90      | 90      | 90                 | 90           | 90                      | 90                 | 90      |
| Hard                    | Correlation coefficient                 | -.602*     | -.471*   | -.603*                  | -.578* | .424*  | -.830* | 1.000  | -.566* | .768*    | -.386* | 0.062  | .520*  | -.287*      | -0.049      | -0.190 | -0.124  | -0.181* | -0.181*            | .758*        | 0.181                   | .758*              | .577*   |
|                         | Significant probability<br>(two-tailed) | 0.000      | 0.000    | 0.000                   | 0.000  | 0.000  | 0.000  |        | 0.000  | 0.000    | 0.000  | 0.560  | 0.000  | 0.006       | 0.644       | 0.073  | 0.209   | 0.088   | 0.088              | 0.000        | 0.088                   | 0.000              |         |
|                         | Frequency                               | 90         | 90       | 90                      | 90     | 90     | 90     | 90     | 90     | 90       | 90     | 90     | 90     | 90          | 90          | 90     | 90      | 90      | 90                 | 90           | 90                      | 90                 | 90      |
| Smooth                  | Correlation coefficient                 | .667*      | .760*    | .607*                   | .470*  | -0.093 | .600*  | -.566* | 1.000  | -.669*   | .696*  | 0.132  | -.519* | .409*       | 0.170       | .268*  | 0.144   | -.242*  | -.242*             | -.548*       | -.242*                  | -.548*             | -.790*  |
|                         | Significant probability<br>(two-tailed) | 0.000      | 0.000    | 0.000                   | 0.000  | 0.381  | 0.000  | 0.000  |        | 0.000    | 0.000  | 0.213  | 0.000  | 0.000       | 0.109       | 0.011  | 0.175   | 0.022   | 0.022              | 0.000        | 0.022                   | 0.000              |         |
|                         | Frequency                               | 90         | 90       | 90                      | 90     | 90     | 90     | 90     | 90     | 90       | 90     | 90     | 90     | 90          | 90          | 90     | 90      | 90      | 90                 | 90           | 90                      | 90                 | 90      |
| Rough                   | Correlation coefficient                 | -.603*     | -.581*   | -.576*                  | -.487* | .421*  | -.814* | .768*  | -.669* | 1.000    | -.402* | -0.038 | .682*  | -.301*      | -0.151      | -.227* | -0.074  | 0.018   | 0.018              | .713*        | -0.018                  | .713*              | .730*   |
|                         | Significant probability<br>(two-tailed) | 0.000      | 0.000    | 0.000                   | 0.000  | 0.000  | 0.000  | 0.000  | 0.000  |          | 0.000  | 0.721  | 0.000  | 0.004       | 0.154       | 0.031  | 0.486   | 0.868   | 0.868              | 0.000        | 0.868                   | 0.000              |         |
|                         | Frequency                               | 90         | 90       | 90                      | 90     | 90     | 90     | 90     | 90     | 90       | 90     | 90     | 90     | 90          | 90          | 90     | 90      | 90      | 90                 | 90           | 90                      | 90                 | 90      |
| Slippery                | Correlation coefficient                 | .417*      | .551*    | .510*                   | .395*  | 0.056  | .382*  | -.386* | .696*  | -.402*   | 1.000  | -0.061 | -.215* | .279*       | 0.014       | 0.129  | 0.195   | -0.055  | -0.055             | -.461*       | 0.055                   | -.461*             | -.516*  |
|                         | Significant probability<br>(two-tailed) | 0.000      | 0.000    | 0.000                   | 0.000  | 0.599  | 0.000  | 0.000  | 0.000  | 0.000    |        | 0.565  | 0.042  | 0.008       | 0.753       | 0.226  | 0.065   | 0.604   | 0.604              | 0.000        | 0.604                   | 0.000              |         |
|                         | Frequency                               | 90         | 90       | 90                      | 90     | 90     | 90     | 90     | 90     | 90       | 90     | 90     | 90     | 90          | 90          | 90     | 90      | 90      | 90                 | 90           | 90                      | 90                 | 90      |
| Sticky                  | Correlation coefficient                 | 0.135      | .241*    | 0.044                   | -0.024 | 0.089  | -0.016 | 0.062  | 0.132  | -0.038   | -0.061 | 1.000  | -.236* | .337*       | 0.064       | 0.082  | 0.152   | -.348*  | -.348*             | 0.119        | .348*                   | 0.119              | -.230*  |
|                         | Significant probability<br>(two-tailed) | 0.204      | 0.022    | 0.682                   | 0.819  | 0.405  | 0.880  | 0.560  | 0.213  | 0.721    | 0.565  |        | 0.025  | 0.001       | 0.549       | 0.629  | 0.153   | 0.001   | 0.001              | 0.266        | 0.001                   | 0.266              |         |
|                         | Frequency                               | 90         | 90       | 90                      | 90     | 90     | 90     | 90     | 90     | 90       | 90     | 90     | 90     | 90          | 90          | 90     | 90      | 90      | 90                 | 90           | 90                      | 90                 | 90      |
| Dry                     | Correlation coefficient                 | -.452*     | -.501*   | -.361*                  | -.284* | 0.196  | -.569* | .520*  | -.519* | .682*    | -.215* | -.236* | 1.000  | -.427*      | -0.201      | -.356* | 0.076   | 0.303   | 0.303              | .462*        | -0.303                  | .462*              | .665*   |
|                         | Significant probability<br>(two-tailed) | 0.000      | 0.000    | 0.000                   | 0.005  | 0.063  | 0.000  | 0.000  | 0.000  | 0.042    | 0.025  | 0.000  |        | 0.000       | 0.058       | 0.001  | 0.476   | 0.055   | 0.055              | 0.000        | 0.055                   | 0.000              |         |
|                         | Frequency                               | 90         | 90       | 90                      | 90     | 90     | 90     | 90     | 90     | 90       | 90     | 90     | 90     | 90          | 90          | 90     | 90      | 90      | 90                 | 90           | 90                      | 90                 | 90      |
| Moist                   | Correlation coefficient                 | .434*      | .568*    | .431*                   | .398*  | 0.115  | .321*  | -.287* | .409*  | -.301*   | .279*  | .337*  | -.427* | 1.000       | -0.028      | -0.018 | 0.073   | -.225*  | -.225*             | -.271*       | .225*                   | -.271*             | -.497*  |
|                         | Significant probability<br>(two-tailed) | 0.000      | 0.000    | 0.000                   | 0.000  | 0.281  | 0.002  | 0.006  | 0.000  | 0.004    | 0.008  | 0.001  | 0.000  |             | 0.853       | 0.967  | 0.497   | 0.033   | 0.033              | 0.010        | 0.033                   | 0.010              |         |
|                         | Frequency                               | 90         | 90       | 90                      | 90     | 90     | 90     | 90     | 90     | 90       | 90     | 90     | 90     | 90          | 90          | 90     | 90      | 90      | 90                 | 90           | 90                      | 90                 | 90      |
| $F_{1}^{+}$             | Correlation coefficient                 | 0.016      | 0.119    | 0.029                   | -0.018 | -0.101 | 0.064  | -0.049 | 0.170  | -0.153   | 0.034  | 0.064  | -0.201 | -0.020      | 1.000       | .882*  | -0.113  | -0.144  | -0.144             | -0.037       | 0.144                   | -0.037             | -0.180* |
|                         | Significant probability<br>(two-tailed) | 0.879      | 0.264    | 0.851                   | 0.869  | 0.343  | 0.547  | 0.644  | 0.109  | 0.154    | 0.753  | 0.549  | 0.058  | 0.853       |             | 0.000  | 0.299   | 0.177   | 0.177              | 0.731        | 0.177                   | 0.731              |         |
|                         | Frequency                               | 90         | 90       | 90                      | 90     | 90     | 90     | 90     | 90     | 90       | 90     | 90     | 90     | 90          | 90          | 90     | 90      | 90      | 90                 | 90           | 90                      | 90                 | 90      |
| $F_{1}^{-}$             | Correlation coefficient                 | 0.076      | .217*    | 0.072                   | 0.072  | -0.124 | 0.195  | -0.190 | .268*  | -.227*   | 0.129  | 0.052  | -.356* | -0.018      | .882*       | 1.000  | -0.136  | -0.127  | -0.127             | -0.136       | 0.127                   | -0.136             | -.263*  |
|                         | Significant probability<br>(two-tailed) | 0.479      | 0.040    | 0.499                   | 0.498  | 0.246  | 0.066  | 0.073  | 0.011  | 0.031    | 0.226  | 0.629  | 0.001  | 0.867       | 0.000       |        | 0.209   | 0.233   | 0.233              | 0.202        | 0.233                   | 0.202              |         |
|                         | Frequency                               | 90         | 90       | 90                      | 90     | 90     | 90     | 90     | 90     | 90       | 90     | 90     | 90     | 90          | 90          | 90     | 90      | 90      | 90                 | 90           | 90                      | 90                 | 90      |
| $r$                     | Correlation coefficient                 | 0.179      | .271*    | 0.141                   | -0.002 | -0.048 | 0.083  | -0.134 | 0.144  | -0.074   | 0.195  | 0.152  | 0.076  | 0.073       | -0.111      | -0.136 | 1.000   | -0.113  | -0.113             | -0.060       | 0.113                   | -0.060             | -0.173* |
|                         | Significant probability<br>(two-tailed) | 0.091      | 0.009    | 0.185                   | 0.986  | 0.650  | 0.439  | 0.209  | 0.175  | 0.486    | 0.065  | 0.153  | 0.476  | 0.497       | 0.299       | 0.200  |         | 0.289   | 0.289              | 0.573        | 0.289                   | 0.573              |         |
|                         | Frequency                               | 90         | 90       | 90                      | 90     | 90     | 90     | 90     | 90     | 90       | 90     | 90     | 90     | 90          | 90          | 90     | 90      | 90      | 90                 | 90           | 90                      | 90                 | 90      |
| $S_{0}$                 | Correlation coefficient                 | -0.039     | -.263*   | .231*                   | .366*  | -.355* | 0.157  | -0.181 | -.342* | 0.018    | -0.055 | -.348* | 0.203* | -.225*      | -0.144      | -0.127 | -0.113  | 1.000   | 1.000              | -.500*       | -1.000*                 | -.500*             |         |
|                         | Significant probability<br>(two-tailed) | 0.776      | 0.012    | 0.028                   | 0.000  | 0.001  | 0.140  | 0.088  | 0.022  | 0.868    | 0.604  | 0.001  | 0.055  | 0.033       | 0.177       | 0.233  | 0.289   |         |                    | 0.000        | 0.000                   | 0.000              |         |
|                         | Frequency                               | 90         | 90       | 90                      | 90     | 90     | 90     | 90     | 90     | 90       | 90     | 90     | 90     | 90          | 90          | 90     | 90      | 90      | 90                 | 90           | 90                      | 90                 | 90      |
| $S_{1}$                 | Correlation coefficient                 | -0.039     | -.263*   | .231*                   | .366*  | -.355* | 0.157  | -0.181 | -.342* | 0.018    | -0.055 | -.348* | 0.203* | -.225*      | -0.144      | -0.127 | -0.113  | 1.000   | 1.000              | -.500*       | -1.000*                 | -.500*             |         |
|                         | Significant probability<br>(two-tailed) | 0.776      | 0.012    | 0.028                   | 0.000  | 0.001  | 0.140  | 0.088  | 0.022  | 0.868    | 0.604  | 0.001  | 0.055  | 0.033       | 0.177       | 0.233  | 0.289   |         |                    | 0.000        | 0.000                   | 0.000              |         |
|                         | Frequency                               | 90         | 90       | 90                      | 90     | 90     | 90     | 90     | 90     | 90       | 90     | 90     | 90     | 90          | 90          | 90     | 90      | 90      | 90                 | 90           | 90                      | 90                 | 90      |
| Young's<br>modulus      | Correlation coefficient                 | -.603*     | -.465*   | -.711*                  | -.736* | .484*  | -.782* | .758*  | -.548* | .713*    | -.461* | 0.119  | .462*  | -.271*      | -0.037      | -0.136 | -0.060  | -.500*  | -.500*             |              |                         |                    |         |

(c) TA condition

|                         |                                         | Attraction | Humidity | Slight warm<br>(medium) | Warm   | Cold   | Soft   | Hard   | Smooth | Rough  | Slippery | Sticky | Dry    | Moist  | $F_{1}^{max}$ | $F_{1}^{min}$ | $r$    | $S_0$  | $S_c$  | Young's<br>modulus | $g_{max}$ | Thermal<br>conductivity | Surface<br>tension |    |
|-------------------------|-----------------------------------------|------------|----------|-------------------------|--------|--------|--------|--------|--------|--------|----------|--------|--------|--------|---------------|---------------|--------|--------|--------|--------------------|-----------|-------------------------|--------------------|----|
| Attraction              | Correlation coefficient                 | 1.000      | .699     | .661                    | .385   | -0.000 | .535   | -.533  | .687   | -.522  | .555     | 0.062  | -.314  | .389   | 0.019         | 0.005         | 0.119  | -0.034 | -0.034 | .519               | 0.034     | -.519                   | -.553              |    |
|                         | Significant probability<br>(two-tailed) | 0.000      | 0.000    | 0.000                   | 0.000  | 0.576  | 0.000  | 0.000  | 0.000  | 0.000  | 0.000    | 0.560  | 0.003  | 0.000  | 0.859         | 0.962         | 0.263  | 0.748  | 0.748  | 0.000              | 0.748     | 0.000                   | 0.000              |    |
|                         | Frequency                               | 90         | 90       | 90                      | 90     | 90     | 90     | 90     | 90     | 90     | 90       | 90     | 90     | 90     | 90            | 90            | 90     | 90     | 90     | 90                 | 90        | 90                      | 90                 | 90 |
|                         | Correlation coefficient                 | .699       | 1.000    | .562                    | .291   | -0.071 | .383   | -.413  | .655   | .440   | .520     | .214   | -.360  | .463   | 0.077         | 0.039         | 0.163  | -.329  | -.329  | -.308              | -.329     | -.308                   | -.637              |    |
| Humidity                | Significant probability<br>(two-tailed) | 0.000      | 0.000    | 0.005                   | 0.504  | 0.000  | 0.000  | 0.000  | 0.000  | 0.000  | 0.000    | 0.043  | 0.006  | 0.000  | 0.473         | 0.714         | 0.125  | 0.002  | 0.002  | 0.003              | 0.002     | 0.003                   | 0.000              |    |
|                         | Frequency                               | 90         | 90       | 90                      | 90     | 90     | 90     | 90     | 90     | 90     | 90       | 90     | 90     | 90     | 90            | 90            | 90     | 90     | 90     | 90                 | 90        | 90                      | 90                 | 90 |
|                         | Correlation coefficient                 | .661       | .562     | 1.000                   | .718   | -.384  | .714   | -.702  | .551   | -.595  | .436     | -.004  | .337   | .492   | 0.104         | 0.099         | 0.137  | 0.197  | 0.197  | -.749              | -0.197    | -.749                   | -.553              |    |
|                         | Significant probability<br>(two-tailed) | 0.000      | 0.000    | 0.000                   | 0.000  | 0.000  | 0.000  | 0.000  | 0.000  | 0.000  | 0.000    | 0.973  | 0.001  | 0.000  | 0.330         | 0.352         | 0.198  | 0.062  | 0.062  | 0.000              | 0.062     | 0.000                   | 0.000              |    |
| Slight warm<br>(medium) | Frequency                               | 90         | 90       | 90                      | 90     | 90     | 90     | 90     | 90     | 90     | 90       | 90     | 90     | 90     | 90            | 90            | 90     | 90     | 90     | 90                 | 90        | 90                      | 90                 | 90 |
|                         | Correlation coefficient                 | .385       | .291     | .718                    | 1.000  | -.308  | .546   | -.539  | .339   | -.417  | .231     | 0.084  | -0.203 | .313   | 0.054         | 0.028         | 0.035  | .330   | .330   | -.623              | -.330     | -.623                   | -.292              |    |
|                         | Significant probability<br>(two-tailed) | 0.000      | 0.005    | 0.000                   | 0.000  | 0.003  | 0.000  | 0.000  | 0.001  | 0.000  | 0.029    | 0.430  | 0.055  | 0.003  | 0.612         | 0.793         | 0.743  | 0.001  | 0.001  | 0.000              | 0.001     | 0.000                   | 0.005              |    |
|                         | Frequency                               | 90         | 90       | 90                      | 90     | 90     | 90     | 90     | 90     | 90     | 90       | 90     | 90     | 90     | 90            | 90            | 90     | 90     | 90     | 90                 | 90        | 90                      | 90                 | 90 |
| Warm                    | Correlation coefficient                 | .687       | .655     | .551                    | .339   | -0.106 | .622   | -.600  | 1.000  | -.629  | .774     | 0.127  | -.342  | .463   | 0.045         | 0.044         | 0.108  | -0.181 | -0.181 | -.546              | -.181     | -.546                   | -.727              |    |
|                         | Significant probability<br>(two-tailed) | 0.000      | 0.000    | 0.000                   | 0.001  | 0.322  | 0.000  | 0.000  | 0.000  | 0.000  | 0.000    | 0.232  | 0.001  | 0.000  | 0.673         | 0.677         | 0.310  | 0.087  | 0.087  | 0.000              | 0.087     | 0.000                   | 0.000              |    |
|                         | Frequency                               | 90         | 90       | 90                      | 90     | 90     | 90     | 90     | 90     | 90     | 90       | 90     | 90     | 90     | 90            | 90            | 90     | 90     | 90     | 90                 | 90        | 90                      | 90                 | 90 |
|                         | Correlation coefficient                 | -0.000     | -0.071   | -.384                   | -.308  | 1.000  | -.516  | .524   | -0.106 | .379   | 0.042    | 0.113  | 0.149  | 0.071  | -0.201        | -.361         | 0.019  | .349   | -.349  | .485               | .349      | .485                    | 0.136              |    |
| Cold                    | Significant probability<br>(two-tailed) | 0.576      | 0.504    | 0.000                   | 0.003  | 0.000  | 0.000  | 0.000  | 0.332  | 0.000  | 0.695    | 0.288  | 0.161  | 0.505  | 0.057         | 0.013         | 0.862  | 0.001  | 0.001  | 0.000              | 0.001     | 0.000                   | 0.201              |    |
|                         | Frequency                               | 90         | 90       | 90                      | 90     | 90     | 90     | 90     | 90     | 90     | 90       | 90     | 90     | 90     | 90            | 90            | 90     | 90     | 90     | 90                 | 90        | 90                      | 90                 | 90 |
|                         | Correlation coefficient                 | .535       | .383     | .714                    | .546   | -.516  | 1.000  | -.875  | .622   | -.736  | .415     | -0.059 | .409   | .293   | 0.032         | 0.148         | 0.045  | .251   | .251   | -.819              | -.251     | -.819                   | -.569              |    |
|                         | Significant probability<br>(two-tailed) | 0.000      | 0.000    | 0.000                   | 0.000  | 0.000  | 0.000  | 0.000  | 0.000  | 0.000  | 0.000    | 0.583  | 0.000  | 0.005  | 0.763         | 0.163         | 0.671  | 0.017  | 0.017  | 0.000              | 0.017     | 0.000                   | 0.000              |    |
| Soft                    | Frequency                               | 90         | 90       | 90                      | 90     | 90     | 90     | 90     | 90     | 90     | 90       | 90     | 90     | 90     | 90            | 90            | 90     | 90     | 90     | 90                 | 90        | 90                      | 90                 | 90 |
|                         | Correlation coefficient                 | -.533      | -.413    | -.702                   | -.539  | .524   | -.875  | 1.000  | -.600  | .761   | -.397    | -0.018 | .403   | -.343  | -0.043        | -0.142        | -0.155 | -0.164 | -0.164 | .791               | -.164     | .791                    | .627               |    |
|                         | Significant probability<br>(two-tailed) | 0.000      | 0.000    | 0.000                   | 0.000  | 0.000  | 0.000  | 0.000  | 0.000  | 0.000  | 0.000    | 0.000  | 0.000  | 0.001  | 0.686         | 0.000         | 0.181  | 0.144  | 0.123  | 0.000              | 0.123     | 0.000                   | 0.000              |    |
|                         | Frequency                               | 90         | 90       | 90                      | 90     | 90     | 90     | 90     | 90     | 90     | 90       | 90     | 90     | 90     | 90            | 90            | 90     | 90     | 90     | 90                 | 90        | 90                      | 90                 | 90 |
| Hard                    | Correlation coefficient                 | .687       | .655     | .551                    | .339   | -0.106 | .622   | -.600  | 1.000  | -.629  | .774     | 0.127  | -.342  | .463   | 0.045         | 0.044         | 0.108  | -0.181 | -0.181 | -.546              | -.181     | -.546                   | -.727              |    |
|                         | Significant probability<br>(two-tailed) | 0.000      | 0.000    | 0.000                   | 0.001  | 0.322  | 0.000  | 0.000  | 0.000  | 0.000  | 0.000    | 0.232  | 0.001  | 0.000  | 0.673         | 0.677         | 0.310  | 0.087  | 0.087  | 0.000              | 0.087     | 0.000                   | 0.000              |    |
|                         | Frequency                               | 90         | 90       | 90                      | 90     | 90     | 90     | 90     | 90     | 90     | 90       | 90     | 90     | 90     | 90            | 90            | 90     | 90     | 90     | 90                 | 90        | 90                      | 90                 | 90 |
|                         | Correlation coefficient                 | -.522      | -.440    | -.595                   | -.417  | .379   | -.736  | .761   | -.629  | 1.000  | -.485    | -0.121 | .522   | -.422  | -0.155        | -.222         | -0.098 | 0.078  | 0.078  | .676               | -0.078    | .676                    | .754               |    |
| Rough                   | Significant probability<br>(two-tailed) | 0.000      | 0.000    | 0.000                   | 0.000  | 0.000  | 0.000  | 0.000  | 0.000  | 0.000  | 0.000    | 0.258  | 0.000  | 0.000  | 0.140         | 0.035         | 0.257  | 0.465  | 0.465  | 0.000              | 0.465     | 0.000                   | 0.000              |    |
|                         | Frequency                               | 90         | 90       | 90                      | 90     | 90     | 90     | 90     | 90     | 90     | 90       | 90     | 90     | 90     | 90            | 90            | 90     | 90     | 90     | 90                 | 90        | 90                      | 90                 | 90 |
|                         | Correlation coefficient                 | .555       | .520     | .436                    | .231   | 0.042  | .415   | -.397  | .774   | -.485  | 1.000    | 0.112  | -0.156 | .426   | 0.063         | 0.024         | .217   | -0.115 | -0.115 | -.447              | -.115     | -.447                   | -.561              |    |
|                         | Significant probability<br>(two-tailed) | 0.000      | 0.000    | 0.000                   | 0.029  | 0.695  | 0.000  | 0.000  | 0.000  | 0.000  | 0.000    | 0.294  | 0.143  | 0.000  | 0.553         | 0.820         | 0.040  | 0.282  | 0.282  | 0.000              | 0.282     | 0.000                   | 0.000              |    |
| Slippery                | Frequency                               | 90         | 90       | 90                      | 90     | 90     | 90     | 90     | 90     | 90     | 90       | 90     | 90     | 90     | 90            | 90            | 90     | 90     | 90     | 90                 | 90        | 90                      | 90                 | 90 |
|                         | Correlation coefficient                 | 0.062      | .314     | -0.004                  | 0.084  | 0.113  | -0.059 | -0.018 | 0.127  | -0.121 | 0.112    | 1.000  | -0.087 | .337   | -0.048        | -0.140        | .249   | -.411  | -.411  | 0.098              | -.411     | 0.098                   | -.313              |    |
|                         | Significant probability<br>(two-tailed) | 0.560      | 0.043    | 0.973                   | 0.430  | 0.288  | 0.383  | 0.868  | 0.232  | 0.258  | 0.012    | 0.418  | 0.001  | 0.651  | 0.190         | 0.018         | 0.000  | 0.000  | 0.000  | 0.358              | 0.000     | 0.358                   | 0.003              |    |
|                         | Frequency                               | 90         | 90       | 90                      | 90     | 90     | 90     | 90     | 90     | 90     | 90       | 90     | 90     | 90     | 90            | 90            | 90     | 90     | 90     | 90                 | 90        | 90                      | 90                 | 90 |
| Sticky                  | Correlation coefficient                 | -.314      | -.360    | -.337                   | -0.203 | 0.149  | -.409  | .403   | -.342  | .522   | -0.156   | -0.087 | 1.000  | -.496  | -0.105        | -0.079        | 0.041  | .288   | .288   | .314               | -.288     | .314                    | .603               |    |
|                         | Significant probability<br>(two-tailed) | 0.003      | 0.000    | 0.001                   | 0.055  | 0.161  | 0.000  | 0.000  | 0.001  | 0.000  | 0.143    | 0.418  | 0.000  | 0.320  | 0.460         | 0.702         | 0.006  | 0.006  | 0.001  | 0.006              | 0.001     | 0.000                   | 0.000              |    |
|                         | Frequency                               | 90         | 90       | 90                      | 90     | 90     | 90     | 90     | 90     | 90     | 90       | 90     | 90     | 90     | 90            | 90            | 90     | 90     | 90     | 90                 | 90        | 90                      | 90                 | 90 |
|                         | Correlation coefficient                 | .389       | .463     | .492                    | .313   | 0.071  | .293   | -.343  | .463   | -.422  | .426     | .337   | -.496  | 1.000  | 0.055         | -0.007        | 0.060  | -.347  | -.347  | -.262              | .347      | -.262                   | .609               |    |
| Moist                   | Significant probability<br>(two-tailed) | 0.000      | 0.000    | 0.000                   | 0.003  | 0.505  | 0.005  | 0.001  | 0.000  | 0.000  | 0.000    | 0.001  | 0.000  | 0.000  | 0.609         | 0.951         | 0.572  | 0.001  | 0.001  | 0.013              | 0.001     | 0.013                   | 0.000              |    |
|                         | Frequency                               | 90         | 90       | 90                      | 90     | 90     | 90     | 90     | 90     | 90     | 90       | 90     | 90     | 90     | 90            | 90            | 90     | 90     | 90     | 90                 | 90        | 90                      | 90                 | 90 |
|                         | Correlation coefficient                 | 0.019      | 0.077    | 0.104                   | 0.054  | -0.201 | 0.032  | -0.043 | 0.045  | -0.155 | 0.063    | -0.048 | -0.105 | 0.055  | 1.000         | .846          | 0.047  | -0.191 | -0.191 | -0.023             | -.191     | -0.023                  | -.213              |    |
|                         | Significant probability<br>(two-tailed) | 0.859      | 0.473    | 0.330                   | 0.612  | 0.057  | 0.763  | 0.680  | 0.673  | 0.144  | 0.553    | 0.651  | 0.326  | 0.608  | 0.000         | 0.669         | 0.072  | 0.072  | 0.833  | 0.072              | 0.833     | 0.072                   | 0.044              |    |
| $F_{1}^{max}$           | Frequency                               | 90         | 90       | 90                      | 90     | 90     | 90     | 90     | 90     | 90     | 90       | 90     | 90     | 90     | 90            | 90            | 90     | 90     | 90     | 90                 | 90        | 90                      | 90                 | 90 |
|                         | Correlation coefficient                 | 0.005      | 0.039    | 0.099                   | 0.028  | -.261  | 0.148  | -0.142 | 0.044  | -.222  | 0.024    | -0.140 | -0.079 | -0.007 | .846          | 1.000         | 0.036  | -0.094 | -0.094 | -0.132             | 0.094     | -0.132                  | -.226              |    |
|                         | Significant probability<br>(two-tailed) | 0.962      | 0.714    | 0.352                   | 0.793  | 0.013  | 0.163  | 0.181  | 0.677  | 0.035  | 0.820    | 0.190  | 0.460  | 0.951  | 0.000         | 0.000         | 0.739  | 0.379  | 0.379  | 0.214              | 0.379     | 0.214                   | 0.032              |    |
|                         | Frequency                               | 90         | 90       | 90                      | 90     | 90     | 90     | 90     | 90     | 90     | 90       | 90     | 90     | 90     | 90            | 90            | 90     | 90     | 90     | 90                 | 90        | 90                      | 90                 | 90 |
| $F_{1}^{min}$           | Correlation coefficient                 | 0.119      | 0.163    | 0.137                   | 0.035  | 0.019  | 0.045  | -0.155 | 0.108  | -0.098 | .217     | .249   | 0.041  | 0.060  | 0.047         | 0.036         | 1.000  | -0.155 | -0.155 | -0.070             | 0.155     | -0.070                  | -.225              |    |
|                         | Significant probability<br>(two-tailed) | 0.263      | 0.125    | 0.190                   | 0.743  | 0.862  | 0.671  | 0.144  | 0.310  | 0.357  | 0.040    | 0.018  | 0.702  | 0.572  | 0.669         | 0.739         | 0.000  | 0.144  | 0.144  | 0.514              | 0.144     | 0.514                   | 0.033              |    |
|                         | Frequency                               | 90         | 90       | 90                      | 90     | 90     | 90     | 90     | 90     | 90     | 90       | 90     | 90     | 90     | 90            | 90            | 90     | 90     | 90     | 90                 | 90        | 90                      | 90                 | 90 |
|                         | Correlation coefficient                 | -0.034     | -.329    | 0.197                   | .320   | -.349  | .251   | -0.164 | -0.181 | 0.078  | -.0115   | -.411  | .288   | -.347  | -0.191        | -0.094        | -0.155 | 1.000  | 1.000  | -.500              | -1.000    | -.500                   | -.500              |    |
| Su                      | Significant probability<br>(two-tailed) | 0.748      | 0.002    | 0.062                   | 0.001  | 0.001  | 0.017  | 0.123  | 0.087  | 0.465  | 0.282    | 0.000  | 0.006  | 0.001  | 0.072         | 0.3           |        |        |        |                    |           |                         |                    |    |

(d) TVA condition

|             |                                         | Attraction | Humidity | Slight warm<br>(not autumn) | Warm   | Cold   | Soft  | Hard  | Smooth | Rough  | Slippery | Sticky | Dry   | Moist | $F_c$  | $F_a$  | $\epsilon$ | Sa     | Sc     | Young's<br>modulus | gmic   | Thermal<br>conductivity | Surface<br>tension |       |
|-------------|-----------------------------------------|------------|----------|-----------------------------|--------|--------|-------|-------|--------|--------|----------|--------|-------|-------|--------|--------|------------|--------|--------|--------------------|--------|-------------------------|--------------------|-------|
| Attraction  | Correlation coefficient                 | 1.000      | .807     | .764                        | .580   | -.309  | .632  | -.639 | .667   | -.654  | .515     | .150   | -.562 | .507  | .153   | .125   | .291       | -.0381 | -.0381 | -.549              | .081   | -.549                   | -.730              |       |
|             | Significant probability<br>(two-tailed) | 0.000      | 0.000    | 0.000                       | 0.000  | 0.000  | 0.000 | 0.000 | 0.000  | 0.000  | 0.159    | 0.000  | 0.000 | 0.155 | 0.241  | 0.005  | 0.088      | 0.088  | 0.000  | 0.088              | 0.000  | 0.000                   |                    |       |
|             | Frequency                               | 90         | 90       | 90                          | 90     | 90     | 90    | 90    | 90     | 90     | 90       | 90     | 90    | 90    | 90     | 90     | 90         | 90     | 90     | 90                 | 90     | 90                      | 90                 |       |
|             | Correlation coefficient                 | .807       | 1.000    | .764                        | .489   | -.283  | .578  | .580  | -.587  | .686   | -.690    | .290   | -.486 | .397  | .150   | .149   | .323       | .247   | -.0487 | -.0487             | -.244  | .0487                   | -.244              | -.716 |
| Humidity    | Significant probability<br>(two-tailed) | 0.000      | 0.000    | 0.000                       | 0.007  | 0.000  | 0.000 | 0.000 | 0.000  | 0.000  | 0.014    | 0.000  | 0.000 | 0.158 | 0.161  | 0.001  | 0.020      | 0.020  | 0.000  | 0.020              | 0.000  | 0.000                   | 0.000              |       |
|             | Frequency                               | 90         | 90       | 90                          | 90     | 90     | 90    | 90    | 90     | 90     | 90       | 90     | 90    | 90    | 90     | 90     | 90         | 90     | 90     | 90                 | 90     | 90                      | 90                 |       |
|             | Correlation coefficient                 | .764       | .722     | 1.000                       | .700   | -.400  | .642  | -.569 | .662   | -.611  | .577     | .0053  | -.541 | -.461 | .108   | .0068  | 0.179      | 0.138  | 0.138  | -.700              | -.138  | -.700                   | -.571              |       |
|             | Significant probability<br>(two-tailed) | 0.000      | 0.000    | 0.000                       | 0.000  | 0.000  | 0.000 | 0.000 | 0.000  | 0.000  | 0.622    | 0.000  | 0.000 | 0.311 | 0.356  | 0.092  | 0.196      | 0.196  | 0.000  | 0.196              | 0.000  | 0.000                   | 0.000              |       |
| Slight warm | Frequency                               | 90         | 90       | 90                          | 90     | 90     | 90    | 90    | 90     | 90     | 90       | 90     | 90    | 90    | 90     | 90     | 90         | 90     | 90     | 90                 | 90     | 90                      | 90                 |       |
|             | Correlation coefficient                 | .580       | .489     | .790                        | 1.000  | -.564  | .669  | -.504 | .480   | -.516  | .437     | -.0111 | -.440 | .303  | .0067  | 0.122  | 0.127      | .360   | .360   | -.756              | -.360  | -.756                   | -.393              |       |
|             | Significant probability<br>(two-tailed) | 0.000      | 0.000    | 0.000                       | 0.000  | 0.000  | 0.000 | 0.000 | 0.000  | 0.000  | 0.296    | 0.000  | 0.004 | 0.530 | 0.253  | 0.234  | 0.000      | 0.000  | 0.000  | 0.000              | 0.000  | 0.000                   | 0.000              |       |
|             | Frequency                               | 90         | 90       | 90                          | 90     | 90     | 90    | 90    | 90     | 90     | 90       | 90     | 90    | 90    | 90     | 90     | 90         | 90     | 90     | 90                 | 90     | 90                      | 90                 |       |
| Warm        | Correlation coefficient                 | -.369      | -.283    | -.460                       | -.564  | 1.000  | -.497 | .470  | -.236  | .487   | -.0112   | .213   | .380  | -.033 | -.034  | -.0066 | -.0399     | -.290  | -.290  | .555               | -.290  | .555                    | .365               |       |
|             | Significant probability<br>(two-tailed) | 0.000      | 0.007    | 0.000                       | 0.000  | 0.000  | 0.000 | 0.000 | 0.025  | 0.000  | 0.293    | 0.043  | 0.000 | 0.755 | 0.753  | 0.603  | 0.074      | 0.006  | 0.006  | 0.000              | 0.006  | 0.000                   | 0.012              |       |
|             | Frequency                               | 90         | 90       | 90                          | 90     | 90     | 90    | 90    | 90     | 90     | 90       | 90     | 90    | 90    | 90     | 90     | 90         | 90     | 90     | 90                 | 90     | 90                      | 90                 |       |
|             | Correlation coefficient                 | .632       | .575     | .642                        | .669   | -.497  | 1.000 | -.822 | .652   | -.749  | .487     | -.0339 | -.658 | .382  | .047   | 0.092  | 0.162      | 0.172  | 0.172  | -.773              | -.773  | -.601                   | -.601              |       |
| Soft        | Significant probability<br>(two-tailed) | 0.000      | 0.000    | 0.000                       | 0.000  | 0.000  | 0.000 | 0.000 | 0.000  | 0.000  | 0.717    | 0.000  | 0.662 | 0.390 | 0.126  | 0.105  | 0.105      | 0.105  | 0.000  | 0.105              | 0.000  | 0.000                   | 0.000              |       |
|             | Frequency                               | 90         | 90       | 90                          | 90     | 90     | 90    | 90    | 90     | 90     | 90       | 90     | 90    | 90    | 90     | 90     | 90         | 90     | 90     | 90                 | 90     | 90                      | 90                 |       |
|             | Correlation coefficient                 | -.639      | -.589    | -.569                       | -.504  | .470   | 1.000 | -.675 | .796   | -.472  | -.0111   | .659   | -.426 | -.007 | -.0058 | -.224  | .0314      | 0.0314 | .699   | -.0314             | .699   | .713                    |                    |       |
|             | Significant probability<br>(two-tailed) | 0.000      | 0.000    | 0.000                       | 0.000  | 0.000  | 0.000 | 0.000 | 0.000  | 0.000  | 0.915    | 0.000  | 0.877 | 0.589 | 0.034  | 0.896  | 0.896      | 0.000  | 0.896  | 0.000              | 0.896  | 0.000                   | 0.000              |       |
| Cold        | Frequency                               | 90         | 90       | 90                          | 90     | 90     | 90    | 90    | 90     | 90     | 90       | 90     | 90    | 90    | 90     | 90     | 90         | 90     | 90     | 90                 | 90     | 90                      | 90                 |       |
|             | Correlation coefficient                 | -.369      | -.283    | -.460                       | -.564  | 1.000  | -.497 | .470  | -.236  | .487   | -.0112   | .213   | .380  | -.033 | -.034  | -.0066 | -.0399     | -.290  | -.290  | .555               | -.290  | .555                    | .365               |       |
|             | Significant probability<br>(two-tailed) | 0.000      | 0.007    | 0.000                       | 0.000  | 0.000  | 0.000 | 0.000 | 0.025  | 0.000  | 0.293    | 0.043  | 0.000 | 0.755 | 0.753  | 0.603  | 0.074      | 0.006  | 0.006  | 0.000              | 0.006  | 0.000                   | 0.012              |       |
|             | Frequency                               | 90         | 90       | 90                          | 90     | 90     | 90    | 90    | 90     | 90     | 90       | 90     | 90    | 90    | 90     | 90     | 90         | 90     | 90     | 90                 | 90     | 90                      | 90                 |       |
| Smooth      | Correlation coefficient                 | .632       | .575     | .642                        | .669   | -.497  | 1.000 | -.822 | .652   | -.749  | .487     | -.0339 | -.658 | .382  | .047   | 0.092  | 0.162      | 0.172  | 0.172  | -.773              | -.773  | -.601                   | -.601              |       |
|             | Significant probability<br>(two-tailed) | 0.000      | 0.000    | 0.000                       | 0.000  | 0.000  | 0.000 | 0.000 | 0.000  | 0.000  | 0.717    | 0.000  | 0.662 | 0.390 | 0.126  | 0.105  | 0.105      | 0.105  | 0.000  | 0.105              | 0.000  | 0.000                   |                    |       |
|             | Frequency                               | 90         | 90       | 90                          | 90     | 90     | 90    | 90    | 90     | 90     | 90       | 90     | 90    | 90    | 90     | 90     | 90         | 90     | 90     | 90                 | 90     | 90                      | 90                 |       |
|             | Correlation coefficient                 | -.639      | -.589    | -.569                       | -.504  | .470   | 1.000 | -.675 | .796   | -.472  | -.0111   | .659   | -.426 | -.007 | -.0058 | -.224  | .0314      | 0.0314 | .699   | -.0314             | .699   | .713                    |                    |       |
| Hard        | Significant probability<br>(two-tailed) | 0.000      | 0.000    | 0.000                       | 0.000  | 0.000  | 0.000 | 0.000 | 0.000  | 0.000  | 0.915    | 0.000  | 0.877 | 0.589 | 0.034  | 0.896  | 0.896      | 0.000  | 0.896  | 0.000              | 0.896  | 0.000                   | 0.000              |       |
|             | Frequency                               | 90         | 90       | 90                          | 90     | 90     | 90    | 90    | 90     | 90     | 90       | 90     | 90    | 90    | 90     | 90     | 90         | 90     | 90     | 90                 | 90     | 90                      | 90                 |       |
|             | Correlation coefficient                 | .667       | .686     | .662                        | .480   | -.236  | .652  | -.673 | 1.000  | -.684  | .676     | -.167  | -.548 | .548  | .0665  | 0.126  | .212       | -.0172 | -.0172 | -.571              | -.571  | -.743                   |                    |       |
|             | Significant probability<br>(two-tailed) | 0.000      | 0.000    | 0.000                       | 0.025  | 0.000  | 0.000 | 0.000 | 0.000  | 0.000  | 0.115    | 0.000  | 0.542 | 0.536 | 0.028  | 0.106  | 0.106      | 0.000  | 0.106  | 0.000              | 0.106  | 0.000                   | 0.000              |       |
| Rough       | Frequency                               | 90         | 90       | 90                          | 90     | 90     | 90    | 90    | 90     | 90     | 90       | 90     | 90    | 90    | 90     | 90     | 90         | 90     | 90     | 90                 | 90     | 90                      | 90                 |       |
|             | Correlation coefficient                 | -.654      | -.600    | -.611                       | -.516  | .487   | -.749 | .796  | 1.000  | -.515  | .0001    | .711   | -.382 | -.075 | -.0111 | -.0157 | 0.040      | 0.040  | .684   | -.040              | .684   | .724                    |                    |       |
|             | Significant probability<br>(two-tailed) | 0.000      | 0.000    | 0.000                       | 0.000  | 0.000  | 0.000 | 0.000 | 0.000  | 0.000  | 0.994    | 0.000  | 0.482 | 0.300 | 0.139  | 0.706  | 0.706      | 0.000  | 0.706  | 0.000              | 0.706  | 0.000                   | 0.000              |       |
|             | Frequency                               | 90         | 90       | 90                          | 90     | 90     | 90    | 90    | 90     | 90     | 90       | 90     | 90    | 90    | 90     | 90     | 90         | 90     | 90     | 90                 | 90     | 90                      | 90                 |       |
| Slippery    | Correlation coefficient                 | .515       | .615     | .577                        | .437   | -.0112 | .487  | -.472 | .676   | -.515  | 1.000    | .055   | -.272 | .333  | .078   | 0.143  | .268       | .0007  | -.0007 | -.505              | .0007  | -.505                   | -.512              |       |
|             | Significant probability<br>(two-tailed) | 0.000      | 0.000    | 0.000                       | 0.000  | 0.295  | 0.000 | 0.000 | 0.000  | 0.000  | 0.667    | 0.010  | 0.001 | 0.465 | 0.178  | 0.011  | 0.947      | 0.947  | 0.000  | 0.947              | 0.000  | 0.947                   | 0.000              |       |
|             | Frequency                               | 90         | 90       | 90                          | 90     | 90     | 90    | 90    | 90     | 90     | 90       | 90     | 90    | 90    | 90     | 90     | 90         | 90     | 90     | 90                 | 90     | 90                      | 90                 |       |
|             | Correlation coefficient                 | .150       | .250     | .053                        | -.0111 | .213   | -.039 | -.011 | .167   | .001   | .055     | 1.000  | -.016 | .276  | -.033  | -.0025 | 0.020      | .443   | -.443  | .238               | .443   | .238                    | -.0305             |       |
| Sticky      | Significant probability<br>(two-tailed) | 0.159      | 0.014    | 0.622                       | 0.296  | 0.043  | 0.717 | 0.915 | 0.115  | 0.994  | 0.607    | 0.275  | 0.008 | .896  | .812   | .083   | 0.000      | 0.000  | 0.024  | 0.000              | 0.024  | 0.034                   | 0.053              |       |
|             | Frequency                               | 90         | 90       | 90                          | 90     | 90     | 90    | 90    | 90     | 90     | 90       | 90     | 90    | 90    | 90     | 90     | 90         | 90     | 90     | 90                 | 90     | 90                      | 90                 |       |
|             | Correlation coefficient                 | -.562      | -.490    | -.541                       | -.440  | .380   | -.658 | .659  | -.548  | .711   | -.0217   | -.0116 | 1.000 | -.483 | -.0111 | -.0118 | -.0124     | .028   | 0.128  | .554               | -.128  | .554                    | .682               |       |
|             | Significant probability<br>(two-tailed) | 0.000      | 0.000    | 0.000                       | 0.000  | 0.000  | 0.000 | 0.000 | 0.000  | 0.000  | 0.110    | 0.275  | 0.000 | 0.299 | 0.299  | 0.246  | 0.228      | 0.228  | 0.000  | 0.228              | 0.000  | 0.228                   | 0.000              |       |
| Dry         | Frequency                               | 90         | 90       | 90                          | 90     | 90     | 90    | 90    | 90     | 90     | 90       | 90     | 90    | 90    | 90     | 90     | 90         | 90     | 90     | 90                 | 90     | 90                      | 90                 |       |
|             | Correlation coefficient                 | .507       | .90      | .767                        | .461   | .303   | -.033 | .382  | -.426  | .548   | -.382    | .333   | .276  | -.483 | 1.000  | .0026  | 0.038      | .038   | -.286  | -.286              | -.297  | .286                    | -.297              | .581  |
|             | Significant probability<br>(two-tailed) | 0.000      | 0.000    | 0.000                       | 0.004  | 0.755  | 0.000 | 0.000 | 0.000  | 0.000  | 0.001    | 0.008  | 0.000 | .809  | .719   | .723   | 0.006      | 0.006  | 0.004  | 0.006              | 0.004  | 0.006                   | 0.004              |       |
|             | Frequency                               | 90         | 90       | 90                          | 90     | 90     | 90    | 90    | 90     | 90     | 90       | 90     | 90    | 90    | 90     | 90     | 90         | 90     | 90     | 90                 | 90     | 90                      | 90                 |       |
| $F_c$       | Correlation coefficient                 | 0.151      | 0.150    | 0.108                       | 0.067  | -.034  | .642  | -.047 | .055   | -.075  | .048     | -.015  | -.011 | .029  | 1.000  | .850   | .0015      | 0.161  | -.0161 | .0468              | 0.161  | -.0468                  | -.210              |       |
|             | Significant probability<br>(two-tailed) | 0.055      | 0.158    | 0.331                       | 0.530  | .753   | .062  | .687  | .0542  | .0482  | .065     | .896   | .299  | .809  | .809   | .809   | .0129      | 0.129  | 0.129  | .655               | .129   | .655                    | .047               |       |
|             | Frequency                               | 90         | 90       | 90                          | 90     | 90     | 90    | 90    | 90     | 90     | 90       | 90     | 90    | 90    | 90     | 90     | 90         | 90     | 90     | 90                 | 90     | 90                      | 90                 |       |
|             | Correlation coefficient                 | 0.125      | 0.149    | 0.098                       | 0.122  | -.056  | .092  | -.058 | 0.126  | -.0111 | 0.143    | 0.025  | -.018 | -.038 | .850   | 1.000  | -.0079     | -.0152 | -.0152 | .0085              | -.0152 | -.0085                  | -.020              |       |
| $F_a$       | Significant probability<br>(two-tailed) | 0.241      | 0.161    | 0.356                       | 0.253  | .603   | .796  | .589  | .026   | .304   | .078     | .0812  | .369  | .719  | 0.006  | .0458  | 0.154      | 0.154  | .638   | 0.154              | .638   | 0.154                   | .638               |       |
|             | Frequency                               | 90         | 90       | 90                          | 90     | 90     | 90    | 90    | 90     | 90     | 90       | 90     | 90    | 90    | 90     | 90     | 90         | 90     | 90     | 90                 | 90     | 90                      | 90                 |       |
|             | Correlation coefficient                 | .291       | .332     | .178                        | 0.127  | -.049  | .146  | -.224 | .252   | .0153  | 0.025    | -.0124 | 0.038 | 0.015 | 0.090  | 1.000  | .4298      | -.4298 | -.038  | 0.4298             | -.038  | -.385                   |                    |       |
|             | Significant probability<br>(two-tailed) | 0.005      | 0.000    | 0.092                       | 0.234  | .074   | .0126 | .034  | .0026  | .0139  | .0011    | .0853  | .246  | .723  | .0889  | .458   | .0053      | 0.053  | 0.157  | 0.053              | .157   | 0.053                   | .157               |       |
| Sa          | Frequency                               | 90         | 90       | 90                          | 90     | 90     | 90    | 90    | 90     | 90     | 90       | 90     | 90    | 90    | 90     | 90     | 90         | 90     | 90     | 90                 | 90     | 90                      | 90                 |       |
|             | Correlation coefficient                 | .0181      | .244     | .0138                       | .360   | -.290  | .172  | -.014 | -.0172 | .0408  | -.0007   | .443   | -.128 | -.286 | -.161  | -.0152 | -.205      | 1.000  | -.000  | -.1600             | -.000  | -.1600                  | -.290              |       |
|             | Significant probability<br>(two-tailed) | 0.088      | 0.020    | 0.196                       | 0.006  | 0.105  | .0896 | .0106 | .0706  | .0497  | 0.000    | .228   | .0006 | .0129 | .154   | .0053  | 0.000      | 0.000  | 0.000  | 0.000              | 0.000  | 0.000                   | 0.000              |       |
|             | Frequency                               | 90         | 90       | 90                          | 90     | 90     | 90    | 90    | 90     | 90     | 90       | 90     | 90    | 90    | 90     | 90     | 90         | 90     | 90     | 90                 | 90     | 90                      | 9                  |       |

**Table S4** Results of Friedman test for smooth, warm, and soft feels.

(1) Smoothness

| Descriptive Statistics |     |        |                |         |         |             |               |
|------------------------|-----|--------|----------------|---------|---------|-------------|---------------|
|                        | N   | Mean   | Std. Deviation | Minimum | Maximum | Percentiles |               |
|                        |     |        |                |         |         | 25th        | 50th (Median) |
| S                      | 120 | 6.8075 | 2.17712        | .10     | 10.00   | 5.7500      | 7.2500        |
| F                      | 120 | 4.9167 | 3.04400        | .00     | 10.00   | 2.4000      | 5.2500        |
| A                      | 120 | .2825  | .53557         | .00     | 2.40    | .0000       | .0000         |

| Descriptive Statistics |             |
|------------------------|-------------|
|                        | Percentiles |
|                        | 75th        |
| S                      | 8.2750      |
| F                      | 7.4750      |
| A                      | .3000       |

### Friedman Test

#### Ranks

|   | Mean Rank |
|---|-----------|
| S | 2.68      |
| F | 2.26      |
| A | 1.05      |

#### Test Statistics<sup>a</sup>

|             |         |
|-------------|---------|
| N           | 120     |
| Chi-Square  | 174.934 |
| df          | 2       |
| Asymp. Sig. | .000    |

a. Friedman Test



(b) Warmth

#### Descriptive Statistics

|   | N   | Mean   | Std. Deviation | Minimum | Maximum | Percentiles |               |
|---|-----|--------|----------------|---------|---------|-------------|---------------|
|   |     |        |                |         |         | 25th        | 50th (Median) |
| S | 120 | 3.9308 | 2.65377        | .00     | 10.00   | 1.9250      | 4.1500        |
| F | 120 | 6.9842 | 2.56158        | .00     | 10.00   | 5.9250      | 7.5000        |
| A | 120 | 1.0433 | 1.66853        | .00     | 7.80    | .0000       | .2000         |

#### Descriptive Statistics

|   | Percentiles |
|---|-------------|
|   | 75th        |
| S | 6.0500      |
| F | 8.9750      |
| A | 1.4000      |

#### Friedman Test

##### Ranks

|   | Mean Rank |
|---|-----------|
| S | 2.05      |
| F | 2.75      |
| A | 1.20      |

##### Test Statistics<sup>a</sup>

|             |         |
|-------------|---------|
| N           | 120     |
| Chi-Square  | 148.391 |
| df          | 2       |
| Asymp. Sig. | .000    |

a. Friedman Test

(c) Softness

#### Descriptive Statistics

|   | N   | Mean   | Std. Deviation | Minimum | Maximum | Percentiles |               |
|---|-----|--------|----------------|---------|---------|-------------|---------------|
|   |     |        |                |         |         | 25th        | 50th (Median) |
| S | 120 | 7.1108 | 2.63747        | .00     | 10.00   | 6.4250      | 7.8500        |
| F | 120 | 8.6383 | 1.77557        | 2.20    | 10.00   | 7.9000      | 9.4500        |
| A | 120 | .4292  | .73099         | .00     | 4.40    | .0000       | .0000         |

#### Descriptive Statistics

|   | Percentiles |
|---|-------------|
|   | 75th        |
| S | 8.8000      |
| F | 10.0000     |
| A | .6000       |

#### Friedman Test

##### Ranks

|   | Mean Rank |
|---|-----------|
| S | 2.26      |
| F | 2.71      |
| A | 1.03      |

##### Test Statistics<sup>a</sup>

|             |         |
|-------------|---------|
| N           | 120     |
| Chi-Square  | 184.333 |
| df          | 2       |
| Asymp. Sig. | .000    |

a. Friedman Test

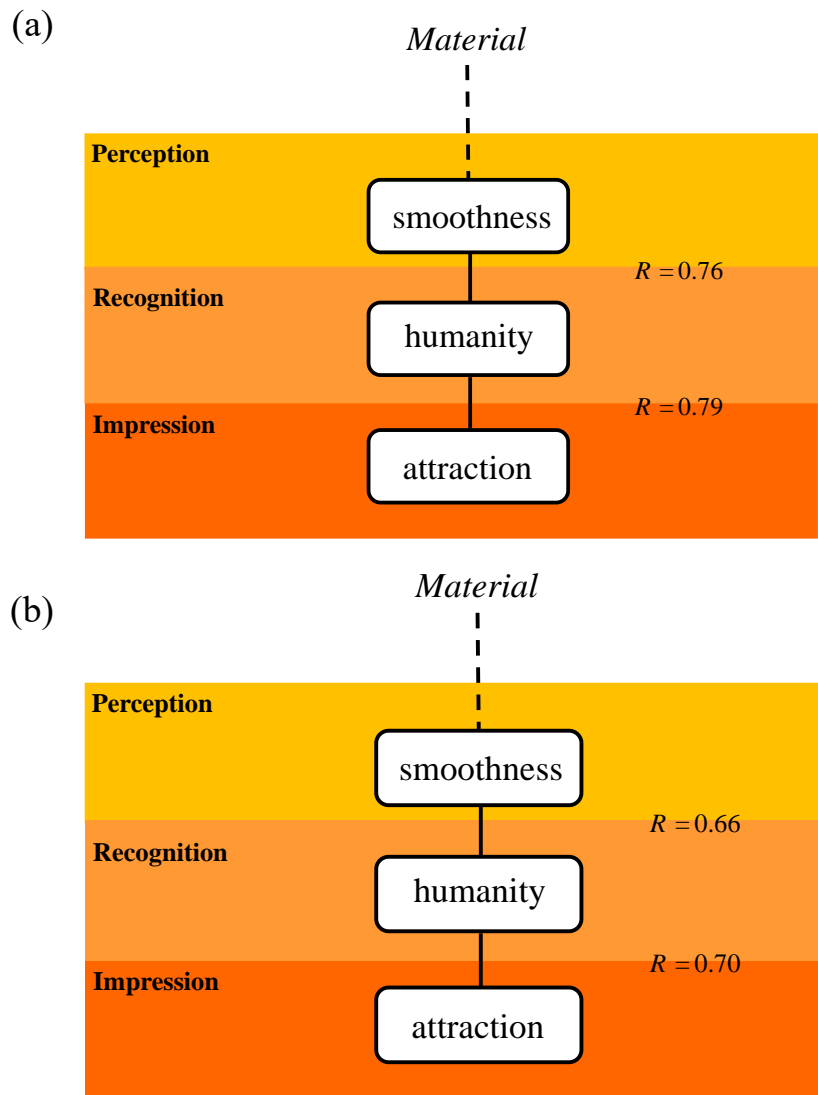

**Figure S1 Relationship diagram between attraction, humanity, tactile and physical factors under TV condition (a) and TA condition (b).** Numeric values are rank correlation coefficient  $R$  between two factors. The dashed line indicates that certain effects are confirmed by Friedman test.
